# Supplementary material
Source: publisher figshare collection journal article supplement (https://sage.figshare.com/ndownloader/files/23742652)
Supplement: Supplementary file 1 [file 23742652]

**Attrition analyses**

Table S1

*Attrition analyses*

|               | Effect size   | Test statistic | <i>p</i> | <i>p</i> <sub>adjust</sub> |
|---------------|---------------|----------------|----------|----------------------------|
| Smoking       | <b>0.038</b>  | 4.23           | <.001    | <.001                      |
| Alcohol heavy | 0.002         | 0.19           | 0.849    | 1.000                      |
| Sedatives     | 0.003         | 0.37           | 0.714    | 1.000                      |
| Soft drugs    | <b>0.038</b>  | 4.13           | <.001    | <.001                      |
| XTC           | <b>0.029</b>  | 3.07           | 0.002    | 0.013                      |
| Hallucinogens | 0.005         | 0.51           | 0.610    | 1.000                      |
| Hard drugs    | -0.014        | -1.53          | 0.127    | 0.577                      |
| E             | <b>0.078</b>  | 3.38           | 0.001    | 0.005                      |
| A             | -0.039        | -1.67          | 0.094    | 0.477                      |
| C             | <b>-0.166</b> | -7.17          | <.001    | <.001                      |
| N             | <b>0.071</b>  | 3.06           | 0.002    | 0.013                      |
| O             | 0.029         | 1.24           | 0.217    | 0.897                      |
| SE            | <b>-0.111</b> | -4.79          | <.001    | <.001                      |
| LS            | <b>-0.101</b> | -4.35          | <.001    | <.001                      |

*Note.* Depicted are the results from the attrition analyses. We ran logistic regressions predicting substance use on the first measurement occasion by attrition status. We can linear regressions predicting personality on the first measurement occasion by attrition status. Effect sizes for substance use were Phi coefficients, while effect sizes for personality were standardized mean differences. Similarly, the test statistics were Z-values and *t*-values for substance use and personality, respectively. The *p*-values were adjusted to control the false discovery rate. Significant group differences are shown in bold. E = extraversion, A = agreeableness, C = conscientiousness, N = neuroticism, O = openness, SE = self-esteem, LS = life satisfaction.

**Updated Power Analysis**

For the power analyses, we simulated  $n = 1000$  datasets for each power condition. In each dataset, we used the existing substance use data but replaced personality data with randomly generated data. The personality data was simulated by including random intercepts and effects of substance use between and within subjects on personality. Note that we did not model random slopes for the within-person effects, which would lead to slight overestimations of the power.

Table S2

*Updated power analysis*

|               | Power within subjects |           |           |           | Power between subjects |           |           |           |
|---------------|-----------------------|-----------|-----------|-----------|------------------------|-----------|-----------|-----------|
|               | $d = .10$             | $d = .30$ | $d = .50$ | $d = .80$ | $d = .10$              | $d = .30$ | $d = .50$ | $d = .80$ |
| Smoking       | .995                  | 1.00      | 1.00      | 1.00      | .877                   | 1.00      | 1.00      | 1.00      |
| Alcohol heavy | .892                  | 1.00      | 1.00      | 1.00      | .081                   | .970      | 1.00      | 1.00      |
| Sedatives     | .842                  | 1.00      | 1.00      | 1.00      | .093                   | .964      | 1.00      | 1.00      |
| Soft drugs    | .449                  | 1.00      | 1.00      | 1.00      | .108                   | .991      | 1.00      | 1.00      |
| Ecstasy       | .072                  | .940      | 1.00      | 1.00      | .005                   | .239      | .749      | .999      |
| Hallucinogens | .020                  | .364      | .937      | 1.00      | .007                   | .038      | .127      | .487      |
| Hard drugs    | .047                  | .827      | 1.00      | 1.00      | .007                   | .238      | .774      | .997      |

*Note.* Values represent the simulated power from  $n = 1000$  iterations. The significance threshold was set at  $t = 2.97$ , corresponding to a two-tailed  $p = .003$  for large degrees of freedom.

**Full models**

Table S3

*DV: Extraversion, IV: Smoking*

|                  | <i>B</i> | <i>se</i> | <i>t</i> | <i>df</i> | <i>p</i> | <i>Pone-tailed</i> | <i>Padjust</i> |
|------------------|----------|-----------|----------|-----------|----------|--------------------|----------------|
| Intercept        | -0.018   | 0.015     | -1.14    | 13414     | .253     |                    |                |
| Age              | -0.003   | 0.001     | -6.42    | 11300     | <.001    |                    |                |
| Age <sup>2</sup> | 0.010    | 0.002     | 4.55     | 25943     | <.001    |                    |                |
| Sex              | 0.017    | 0.018     | 0.90     | 10781     | .366     |                    |                |
| Testing          | -0.010   | 0.002     | -4.40    | 31640     | <.001    |                    |                |
| BP               | 0.162    | 0.025     | 6.51     | 11005     | <.001    | <.001              | <.001          |
| WP               | 0.051    | 0.018     | 2.76     | 932       | .006     |                    | .084           |
| Time             | 0.011    | 0.012     | 0.86     | 24379     | .387     |                    |                |
| WP x time        | -0.098   | 0.072     | -1.37    | 5491      | .171     |                    | 1.000          |

*Note.* BP = between-person effect of the respective substance, WP = within-person effect.

Table S4

*DV: Agreeableness, IV: Smoking*

|                  | <i>B</i> | <i>se</i> | <i>t</i> | <i>df</i> | <i>p</i> | <i>Pone-tailed</i> | <i>Padjust</i> |
|------------------|----------|-----------|----------|-----------|----------|--------------------|----------------|
| Intercept        | -0.292   | 0.014     | -20.27   | 13540     | <.001    |                    |                |
| Age              | 0.005    | 0.000     | 9.78     | 11028     | <.001    |                    |                |
| Age <sup>2</sup> | -0.010   | 0.002     | -4.52    | 20317     | <.001    |                    |                |
| Sex              | 0.644    | 0.017     | 38.46    | 10640     | <.001    |                    |                |
| Testing          | -0.020   | 0.003     | -7.92    | 30522     | <.001    |                    |                |
| BP               | -0.015   | 0.023     | -0.64    | 10974     | .519     |                    | 1.000          |
| WP               | 0.052    | 0.023     | 2.26     | 972       | .024     |                    | .262           |
| Time             | 0.014    | 0.014     | 0.93     | 25574     | .351     |                    |                |
| WP x time        | -0.143   | 0.086     | -1.65    | 6128      | .098     |                    | 1.000          |

*Note.* BP = between-person effect of the respective substance, WP = within-person effect.

Table S5

*DV: Conscientiousness, IV: Smoking*

|                  | <i>B</i> | <i>se</i> | <i>t</i> | <i>df</i> | <i>p</i> | <i>Pone-tailed</i> | <i>Padjust</i> |
|------------------|----------|-----------|----------|-----------|----------|--------------------|----------------|
| Intercept        | 0.024    | 0.015     | 1.62     | 13528     | .105     |                    |                |
| Age              | 0.010    | 0.001     | 20.07    | 11180     | <.001    |                    |                |
| Age <sup>2</sup> | -0.041   | 0.002     | -18.99   | 22299     | <.001    |                    |                |
| Sex              | 0.169    | 0.018     | 9.67     | 10748     | <.001    |                    |                |
| Testing          | -0.008   | 0.002     | -3.22    | 30864     | .001     |                    |                |
| BP               | -0.164   | 0.024     | -6.88    | 11035     | <.001    | <.001              | <.001          |
| WP               | 0.011    | 0.021     | 0.53     | 948       | .595     |                    | 1.000          |
| Time             | 0.018    | 0.014     | 1.33     | 25113     | .185     |                    |                |
| WP x time        | -0.079   | 0.081     | -0.97    | 5824      | .332     |                    | 1.000          |

*Note.* BP = between-person effect of the respective substance, WP = within-person effect.

Table S6

*DV: Neuroticism, IV: Smoking*

|                  | <i>B</i> | <i>se</i> | <i>t</i> | <i>df</i> | <i>p</i> | <i>p</i> <sub>one-tailed</sub> | <i>p</i> <sub>adjust</sub> |
|------------------|----------|-----------|----------|-----------|----------|--------------------------------|----------------------------|
| Intercept        | -0.147   | 0.015     | -9.88    | 13525     | <.001    |                                |                            |
| Age              | -0.006   | 0.001     | -10.82   | 11199     | <.001    |                                |                            |
| Age <sup>2</sup> | 0.009    | 0.002     | 4.30     | 22637     | <.001    |                                |                            |
| Sex              | 0.328    | 0.018     | 18.65    | 10759     | <.001    |                                |                            |
| Testing          | -0.027   | 0.002     | -10.83   | 30938     | <.001    |                                |                            |
| BP               | 0.077    | 0.024     | 3.24     | 11040     | .001     | .001                           | .013                       |
| WP               | -0.077   | 0.020     | -3.84    | 926       | <.001    |                                | .003                       |
| Time             | -0.009   | 0.014     | -0.67    | 25077     | .502     |                                |                            |
| WP x time        | 0.083    | 0.079     | 1.05     | 5395      | .295     |                                | 1.000                      |

*Note.* BP = between-person effect of the respective substance, WP = within-person effect.

Table S7

*DV: Openness, IV: Smoking*

|                  | <i>B</i> | <i>se</i> | <i>t</i> | <i>df</i> | <i>p</i> | <i>p</i> <sub>one-tailed</sub> | <i>p</i> <sub>adjust</sub> |
|------------------|----------|-----------|----------|-----------|----------|--------------------------------|----------------------------|
| Intercept        | 0.170    | 0.015     | 11.29    | 13490     | <.001    |                                |                            |
| Age              | -0.009   | 0.001     | -17.29   | 11199     | <.001    |                                |                            |
| Age <sup>2</sup> | -0.022   | 0.002     | -10.23   | 23103     | <.001    |                                |                            |
| Sex              | -0.176   | 0.018     | -9.89    | 10748     | <.001    |                                |                            |
| Testing          | 0.002    | 0.002     | 0.97     | 31022     | .333     |                                |                            |
| BP               | -0.040   | 0.024     | -1.65    | 11019     | .100     |                                | .901                       |
| WP               | 0.032    | 0.019     | 1.69     | 968       | .092     |                                | .847                       |
| Time             | -0.038   | 0.013     | -2.83    | 24974     | .005     |                                |                            |
| WP x time        | 0.095    | 0.077     | 1.24     | 5341      | .215     |                                | 1.000                      |

*Note.* BP = between-person effect of the respective substance, WP = within-person effect.

Table S8

*DV: Self-esteem, IV: Smoking*

|                  | <i>B</i> | <i>se</i> | <i>t</i> | <i>df</i> | <i>p</i> | <i>p</i> <sub>one-tailed</sub> | <i>p</i> <sub>adjust</sub> |
|------------------|----------|-----------|----------|-----------|----------|--------------------------------|----------------------------|
| Intercept        | 0.198    | 0.015     | 13.08    | 13428     | <.001    |                                |                            |
| Age              | 0.007    | 0.001     | 14.22    | 10969     | <.001    |                                |                            |
| Age <sup>2</sup> | -0.029   | 0.002     | -12.92   | 20715     | <.001    |                                |                            |
| Sex              | -0.154   | 0.018     | -8.73    | 10570     | <.001    |                                |                            |
| Testing          | -0.025   | 0.003     | -9.33    | 30587     | <.001    |                                |                            |
| BP               | -0.063   | 0.024     | -2.62    | 10892     | .009     |                                | .122                       |
| WP               | 0.055    | 0.022     | 2.51     | 939       | .012     |                                | .162                       |
| Time             | -0.005   | 0.015     | -0.32    | 25418     | .748     |                                |                            |
| WP x time        | 0.029    | 0.086     | 0.34     | 5517      | .735     |                                | 1.000                      |

*Note.* BP = between-person effect of the respective substance, WP = within-person effect.

Table S9

*DV: Life satisfaction, IV: Smoking*

|                  | <i>B</i> | <i>se</i> | <i>t</i> | <i>df</i> | <i>p</i> | <i>p</i> <sub>one-tailed</sub> | <i>p</i> <sub>adjust</sub> |
|------------------|----------|-----------|----------|-----------|----------|--------------------------------|----------------------------|
| Intercept        | 0.003    | 0.015     | 0.18     | 13588     | .855     |                                |                            |
| Age              | 0.002    | 0.001     | 3.94     | 11000     | <.001    |                                |                            |
| Age <sup>2</sup> | -0.001   | 0.002     | -0.23    | 19686     | .822     |                                |                            |
| Sex              | 0.021    | 0.017     | 1.20     | 10626     | .232     |                                |                            |
| Testing          | -0.015   | 0.003     | -5.35    | 30458     | <.001    |                                |                            |
| BP               | -0.278   | 0.024     | -11.67   | 10980     | <.001    | <.001                          | <.001                      |
| WP               | 0.046    | 0.024     | 1.90     | 958       | .057     |                                | .549                       |
| Time             | -0.044   | 0.016     | -2.83    | 25818     | .005     |                                |                            |
| WP x time        | -0.029   | 0.093     | -0.31    | 5927      | .754     |                                | 1.000                      |

*Note.* BP = between-person effect of the respective substance, WP = within-person effect.

Table S10

*DV: Extraversion, IV: Alcohol heavy*

|                  | <i>B</i> | <i>se</i> | <i>t</i> | <i>df</i> | <i>p</i> | <i>p</i> <sub>one-tailed</sub> | <i>p</i> <sub>adjust</sub> |
|------------------|----------|-----------|----------|-----------|----------|--------------------------------|----------------------------|
| Intercept        | -0.014   | 0.015     | -0.89    | 13390     | .375     |                                |                            |
| Age              | -0.004   | 0.001     | -6.83    | 11282     | <.001    |                                |                            |
| Age <sup>2</sup> | 0.009    | 0.002     | 4.04     | 26005     | <.001    |                                |                            |
| Sex              | 0.019    | 0.019     | 1.03     | 10798     | .302     |                                |                            |
| Testing          | -0.010   | 0.002     | -4.60    | 31670     | <.001    |                                |                            |
| BP               | 0.158    | 0.065     | 2.42     | 11117     | .015     |                                | .190                       |
| WP               | 0.026    | 0.021     | 1.25     | 22792     | .211     | .105                           | .936                       |
| Time             | 0.010    | 0.012     | 0.78     | 24443     | .438     |                                |                            |
| WP x time        | 0.067    | 0.094     | 0.71     | 23712     | .477     |                                | 1.000                      |

*Note.* BP = between-person effect of the respective substance, WP = within-person effect.

Table S11

*DV: Agreeableness, IV: Alcohol heavy*

|                  | <i>B</i> | <i>se</i> | <i>t</i> | <i>df</i> | <i>p</i> | <i>p</i> <sub>one-tailed</sub> | <i>p</i> <sub>adjust</sub> |
|------------------|----------|-----------|----------|-----------|----------|--------------------------------|----------------------------|
| Intercept        | -0.286   | 0.015     | -19.67   | 13511     | <.001    |                                |                            |
| Age              | 0.005    | 0.000     | 9.89     | 11018     | <.001    |                                |                            |
| Age <sup>2</sup> | -0.010   | 0.002     | -4.71    | 20326     | <.001    |                                |                            |
| Sex              | 0.638    | 0.017     | 37.46    | 10667     | <.001    |                                |                            |
| Testing          | -0.022   | 0.003     | -8.37    | 30529     | <.001    |                                |                            |
| BP               | -0.119   | 0.060     | -1.99    | 11170     | .047     | .023                           | .257                       |
| WP               | 0.007    | 0.025     | 0.29     | 23310     | .774     | .613                           | 1.000                      |
| Time             | 0.013    | 0.015     | 0.93     | 25699     | .354     |                                |                            |
| WP x time        | 0.038    | 0.112     | 0.34     | 24869     | .733     |                                | 1.000                      |

*Note.* BP = between-person effect of the respective substance, WP = within-person effect.

Table S12

*DV: Conscientiousness, IV: Alcohol heavy*

|                  | <i>B</i> | <i>se</i> | <i>t</i> | <i>df</i> | <i>p</i> | <i>p</i> <sub>one-tailed</sub> | <i>p</i> <sub>adjust</sub> |
|------------------|----------|-----------|----------|-----------|----------|--------------------------------|----------------------------|
| Intercept        | 0.029    | 0.015     | 1.93     | 13497     | .054     |                                |                            |
| Age              | 0.010    | 0.001     | 20.55    | 11164     | <.001    |                                |                            |
| Age <sup>2</sup> | -0.041   | 0.002     | -18.89   | 22340     | <.001    |                                |                            |
| Sex              | 0.159    | 0.018     | 8.92     | 10767     | <.001    |                                |                            |
| Testing          | -0.009   | 0.002     | -3.52    | 30875     | <.001    |                                |                            |
| BP               | -0.304   | 0.063     | -4.86    | 11193     | <.001    | <.001                          | <.001                      |
| WP               | -0.026   | 0.023     | -1.12    | 23117     | .262     | .131                           | 1.000                      |
| Time             | 0.017    | 0.014     | 1.25     | 25200     | .212     |                                |                            |
| WP x time        | -0.051   | 0.106     | -0.48    | 24396     | .630     |                                | 1.000                      |

*Note.* BP = between-person effect of the respective substance, WP = within-person effect.

Table S13

*DV: Neuroticism, IV: Alcohol heavy*

|                  | <i>B</i> | <i>se</i> | <i>t</i> | <i>df</i> | <i>p</i> | <i>p</i> <sub>one-tailed</sub> | <i>p</i> <sub>adjust</sub> |
|------------------|----------|-----------|----------|-----------|----------|--------------------------------|----------------------------|
| Intercept        | -0.155   | 0.015     | -10.28   | 13494     | <.001    |                                |                            |
| Age              | -0.006   | 0.001     | -11.08   | 11183     | <.001    |                                |                            |
| Age <sup>2</sup> | 0.010    | 0.002     | 4.41     | 22659     | <.001    |                                |                            |
| Sex              | 0.336    | 0.018     | 18.82    | 10778     | <.001    |                                |                            |
| Testing          | -0.025   | 0.002     | -10.31   | 30938     | <.001    |                                |                            |
| BP               | 0.218    | 0.063     | 3.48     | 11194     | <.001    | <.001                          | .006                       |
| WP               | 0.017    | 0.023     | 0.75     | 23090     | .451     | .225                           | 1.000                      |
| Time             | -0.010   | 0.014     | -0.71    | 25130     | .476     |                                |                            |
| WP x time        | -0.059   | 0.105     | -0.56    | 24332     | .574     |                                | 1.000                      |

*Note.* BP = between-person effect of the respective substance, WP = within-person effect.

Table S14

*DV: Openness, IV: Alcohol heavy*

|                  | <i>B</i> | <i>se</i> | <i>t</i> | <i>df</i> | <i>p</i> | <i>p</i> <sub>one-tailed</sub> | <i>p</i> <sub>adjust</sub> |
|------------------|----------|-----------|----------|-----------|----------|--------------------------------|----------------------------|
| Intercept        | 0.158    | 0.015     | 10.41    | 13460     | <.001    |                                |                            |
| Age              | -0.009   | 0.001     | -17.35   | 11183     | <.001    |                                |                            |
| Age <sup>2</sup> | -0.021   | 0.002     | -9.87    | 23138     | <.001    |                                |                            |
| Sex              | -0.158   | 0.018     | -8.73    | 10768     | <.001    |                                |                            |
| Testing          | 0.002    | 0.002     | 0.84     | 31034     | .403     |                                |                            |
| BP               | 0.305    | 0.063     | 4.82     | 11166     | <.001    |                                | <.001                      |
| WP               | 0.047    | 0.023     | 2.05     | 23023     | .040     |                                | .400                       |
| Time             | -0.038   | 0.013     | -2.85    | 25001     | .004     |                                |                            |
| WP x time        | -0.100   | 0.104     | -0.97    | 24211     | .333     |                                | 1.000                      |

*Note.* BP = between-person effect of the respective substance, WP = within-person effect.

Table S15

*DV: Self-esteem, IV: Alcohol heavy*

|                  | <i>B</i> | <i>se</i> | <i>t</i> | <i>df</i> | <i>p</i> | <i>p</i> <sub>one-tailed</sub> | <i>p</i> <sub>adjust</sub> |
|------------------|----------|-----------|----------|-----------|----------|--------------------------------|----------------------------|
| Intercept        | 0.202    | 0.015     | 13.23    | 13394     | <.001    |                                |                            |
| Age              | 0.007    | 0.001     | 14.45    | 10957     | <.001    |                                |                            |
| Age <sup>2</sup> | -0.029   | 0.002     | -12.91   | 20738     | <.001    |                                |                            |
| Sex              | -0.159   | 0.018     | -8.89    | 10596     | <.001    |                                |                            |
| Testing          | -0.026   | 0.003     | -9.71    | 30578     | <.001    |                                |                            |
| BP               | -0.152   | 0.063     | -2.41    | 11075     | .016     |                                | .191                       |
| WP               | 0.000    | 0.025     | -0.02    | 23159     | .985     |                                | 1.000                      |
| Time             | -0.006   | 0.015     | -0.39    | 25478     | .694     |                                |                            |
| WP x time        | 0.074    | 0.115     | 0.64     | 24647     | .522     |                                | 1.000                      |

*Note.* BP = between-person effect of the respective substance, WP = within-person effect.

Table S16

*DV: Life satisfaction, IV: Alcohol heavy*

|                  | <i>B</i> | <i>se</i> | <i>t</i> | <i>df</i> | <i>p</i> | <i>p</i> <sub>one-tailed</sub> | <i>p</i> <sub>adjust</sub> |
|------------------|----------|-----------|----------|-----------|----------|--------------------------------|----------------------------|
| Intercept        | -0.001   | 0.015     | -0.04    | 13548     | .972     |                                |                            |
| Age              | 0.002    | 0.001     | 4.62     | 10997     | <.001    |                                |                            |
| Age <sup>2</sup> | 0.001    | 0.002     | 0.37     | 19804     | .713     |                                |                            |
| Sex              | 0.020    | 0.018     | 1.13     | 10658     | .258     |                                |                            |
| Testing          | -0.016   | 0.003     | -5.81    | 30462     | <.001    |                                |                            |
| BP               | -0.208   | 0.063     | -3.30    | 11186     | .001     | <.001                          | .011                       |
| WP               | -0.008   | 0.027     | -0.29    | 23401     | .773     | .386                           | 1.000                      |
| Time             | -0.043   | 0.016     | -2.74    | 25880     | .006     |                                |                            |
| WP x time        | 0.074    | 0.121     | 0.61     | 25050     | .544     |                                | 1.000                      |

*Note.* BP = between-person effect of the respective substance, WP = within-person effect.

Table S17

*DV: Extraversion, IV: Sedatives*

|                  | <i>B</i> | <i>se</i> | <i>t</i> | <i>df</i> | <i>p</i> | <i>p</i> <sub>one-tailed</sub> | <i>p</i> <sub>adjust</sub> |
|------------------|----------|-----------|----------|-----------|----------|--------------------------------|----------------------------|
| Intercept        | -0.009   | 0.015     | -0.58    | 13355     | .562     |                                |                            |
| Age              | -0.003   | 0.001     | -6.43    | 11287     | <.001    |                                |                            |
| Age <sup>2</sup> | 0.008    | 0.002     | 3.90     | 25920     | <.001    |                                |                            |
| Sex              | 0.015    | 0.018     | 0.81     | 10782     | .416     |                                |                            |
| Testing          | -0.011   | 0.002     | -4.96    | 31648     | <.001    |                                |                            |
| BP               | -0.191   | 0.064     | -3.00    | 11124     | .003     | .001                           | .024                       |
| WP               | -0.073   | 0.026     | -2.77    | 472       | .006     |                                | .084                       |
| Time             | 0.010    | 0.012     | 0.80     | 24412     | .426     |                                |                            |
| WP x time        | 0.117    | 0.105     | 1.12     | 2122      | .262     |                                | 1.000                      |

*Note.* BP = between-person effect of the respective substance, WP = within-person effect.

Table S18

*DV: Agreeableness, IV: Sedatives*

|                  | <i>B</i> | <i>se</i> | <i>t</i> | <i>df</i> | <i>p</i> | <i>p</i> <sub>one-tailed</sub> | <i>p</i> <sub>adjust</sub> |
|------------------|----------|-----------|----------|-----------|----------|--------------------------------|----------------------------|
| Intercept        | -0.290   | 0.014     | -20.15   | 13491     | <.001    |                                |                            |
| Age              | 0.005    | 0.000     | 9.68     | 11027     | <.001    |                                |                            |
| Age <sup>2</sup> | -0.010   | 0.002     | -4.58    | 20259     | <.001    |                                |                            |
| Sex              | 0.643    | 0.017     | 38.34    | 10647     | <.001    |                                |                            |
| Testing          | -0.021   | 0.003     | -8.32    | 30545     | <.001    |                                |                            |
| BP               | 0.077    | 0.058     | 1.32     | 11175     | .187     |                                | 1.000                      |
| WP               | -0.015   | 0.029     | -0.52    | 514       | .600     |                                | 1.000                      |
| Time             | 0.013    | 0.015     | 0.90     | 25694     | .367     |                                |                            |
| WP x time        | -0.173   | 0.120     | -1.45    | 2150      | .148     |                                | 1.000                      |

*Note.* BP = between-person effect of the respective substance, WP = within-person effect.

Table S19

*DV: Conscientiousness, IV: Sedatives*

|                  | <i>B</i> | <i>se</i> | <i>t</i> | <i>df</i> | <i>p</i> | <i>p</i> <sub>one-tailed</sub> | <i>p</i> <sub>adjust</sub> |
|------------------|----------|-----------|----------|-----------|----------|--------------------------------|----------------------------|
| Intercept        | 0.016    | 0.015     | 1.10     | 13473     | .270     |                                |                            |
| Age              | 0.011    | 0.001     | 20.78    | 11174     | <.001    |                                |                            |
| Age <sup>2</sup> | -0.041   | 0.002     | -18.67   | 22270     | <.001    |                                |                            |
| Sex              | 0.181    | 0.018     | 10.34    | 10751     | <.001    |                                |                            |
| Testing          | -0.009   | 0.002     | -3.69    | 30894     | <.001    |                                |                            |
| BP               | -0.275   | 0.061     | -4.52    | 11187     | <.001    |                                | <.001                      |
| WP               | -0.038   | 0.027     | -1.39    | 480       | .164     |                                | 1.000                      |
| Time             | 0.019    | 0.014     | 1.35     | 25198     | .177     |                                |                            |
| WP x time        | 0.098    | 0.113     | 0.87     | 1974      | .385     |                                | 1.000                      |

*Note.* BP = between-person effect of the respective substance, WP = within-person effect.

Table S20

*DV: Neuroticism, IV: Sedatives*

|                  | <i>B</i> | <i>se</i> | <i>t</i> | <i>df</i> | <i>p</i> | <i>p</i> <sub>one-tailed</sub> | <i>p</i> <sub>adjust</sub> |
|------------------|----------|-----------|----------|-----------|----------|--------------------------------|----------------------------|
| Intercept        | -0.139   | 0.015     | -9.56    | 13463     | <.001    |                                |                            |
| Age              | -0.007   | 0.001     | -13.51   | 11152     | <.001    |                                |                            |
| Age <sup>2</sup> | 0.010    | 0.002     | 4.68     | 22073     | <.001    |                                |                            |
| Sex              | 0.294    | 0.017     | 17.17    | 10733     | <.001    |                                |                            |
| Testing          | -0.023   | 0.002     | -9.47    | 30820     | <.001    |                                |                            |
| BP               | 1.430    | 0.059     | 24.08    | 11180     | <.001    | <.001                          | <.001                      |
| WP               | 0.130    | 0.029     | 4.53     | 511       | <.001    |                                | <.001                      |
| Time             | -0.011   | 0.014     | -0.82    | 25213     | .414     |                                |                            |
| WP x time        | -0.236   | 0.115     | -2.05    | 2248      | .040     |                                | 1.000                      |

*Note.* BP = between-person effect of the respective substance, WP = within-person effect.



Table S21

*DV: Openness, IV: Sedatives*

|                  | <i>B</i> | <i>se</i> | <i>t</i> | <i>df</i> | <i>p</i> | <i>p</i> <sub>one-tailed</sub> | <i>p</i> <sub>adjust</sub> |
|------------------|----------|-----------|----------|-----------|----------|--------------------------------|----------------------------|
| Intercept        | 0.170    | 0.015     | 11.31    | 13433     | <.001    |                                |                            |
| Age              | -0.009   | 0.001     | -17.21   | 11192     | <.001    |                                |                            |
| Age <sup>2</sup> | -0.022   | 0.002     | -10.21   | 23084     | <.001    |                                |                            |
| Sex              | -0.175   | 0.018     | -9.84    | 10751     | <.001    |                                |                            |
| Testing          | 0.002    | 0.002     | 0.73     | 31046     | .465     |                                |                            |
| BP               | 0.039    | 0.062     | 0.63     | 11154     | .529     |                                | 1.000                      |
| WP               | -0.030   | 0.027     | -1.09    | 503       | .275     |                                | 1.000                      |
| Time             | -0.038   | 0.013     | -2.85    | 24989     | .004     |                                |                            |
| WP x time        | -0.074   | 0.112     | -0.66    | 2116      | .507     |                                | 1.000                      |

*Note.* BP = between-person effect of the respective substance, WP = within-person effect.

Table S22

*DV: Self-esteem, IV: Sedatives*

|                  | <i>B</i> | <i>se</i> | <i>t</i> | <i>df</i> | <i>p</i> | <i>p</i> <sub>one-tailed</sub> | <i>p</i> <sub>adjust</sub> |
|------------------|----------|-----------|----------|-----------|----------|--------------------------------|----------------------------|
| Intercept        | 0.191    | 0.015     | 12.81    | 13378     | <.001    |                                |                            |
| Age              | 0.008    | 0.001     | 16.15    | 10948     | <.001    |                                |                            |
| Age <sup>2</sup> | -0.029   | 0.002     | -13.19   | 20412     | <.001    |                                |                            |
| Sex              | -0.129   | 0.017     | -7.42    | 10564     | <.001    |                                |                            |
| Testing          | -0.028   | 0.003     | -10.44   | 30558     | <.001    |                                |                            |
| BP               | -1.050   | 0.060     | -17.39   | 11079     | <.001    |                                | <.001                      |
| WP               | -0.099   | 0.029     | -3.39    | 518       | .001     |                                | .015                       |
| Time             | -0.005   | 0.015     | -0.33    | 25549     | .741     |                                |                            |
| WP x time        | 0.135    | 0.122     | 1.11     | 2134      | .269     |                                | 1.000                      |

*Note.* BP = between-person effect of the respective substance, WP = within-person effect.

Table S23

*DV: Life satisfaction, IV: Sedatives*

|                  | <i>B</i> | <i>se</i> | <i>t</i> | <i>df</i> | <i>p</i> | <i>p</i> <sub>one-tailed</sub> | <i>p</i> <sub>adjust</sub> |
|------------------|----------|-----------|----------|-----------|----------|--------------------------------|----------------------------|
| Intercept        | -0.015   | 0.015     | -1.03    | 13497     | .301     |                                |                            |
| Age              | 0.003    | 0.001     | 6.52     | 10949     | <.001    |                                |                            |
| Age <sup>2</sup> | 0.001    | 0.002     | 0.39     | 19431     | .694     |                                |                            |
| Sex              | 0.057    | 0.017     | 3.30     | 10584     | .001     |                                |                            |
| Testing          | -0.018   | 0.003     | -6.59    | 30327     | <.001    |                                |                            |
| BP               | -1.191   | 0.060     | -19.76   | 11205     | <.001    | <.001                          | <.001                      |
| WP               | -0.091   | 0.038     | -2.40    | 527       | .017     |                                | .191                       |
| Time             | -0.040   | 0.016     | -2.57    | 25878     | .010     |                                |                            |
| WP x time        | 0.413    | 0.141     | 2.93     | 2785      | .003     |                                | .372                       |

*Note.* BP = between-person effect of the respective substance, WP = within-person effect.

Table S24

*DV: Extraversion, IV: Soft drugs*

|                  | <i>B</i> | <i>se</i> | <i>t</i> | <i>df</i> | <i>p</i> | <i>p</i> <sub>one-tailed</sub> | <i>p</i> <sub>adjust</sub> |
|------------------|----------|-----------|----------|-----------|----------|--------------------------------|----------------------------|
| Intercept        | -0.010   | 0.015     | -0.63    | 13327     | .527     |                                |                            |
| Age              | -0.003   | 0.001     | -6.21    | 11264     | <.001    |                                |                            |
| Age <sup>2</sup> | 0.008    | 0.002     | 3.81     | 25934     | <.001    |                                |                            |
| Sex              | 0.015    | 0.018     | 0.81     | 10777     | .415     |                                |                            |
| Testing          | -0.011   | 0.002     | -4.79    | 31791     | <.001    |                                |                            |
| BP               | 0.152    | 0.058     | 2.62     | 11685     | .009     |                                | .122                       |
| WP               | 0.000    | 0.039     | -0.00    | 273       | .998     | .499                           | 1.000                      |
| Time             | 0.009    | 0.012     | 0.71     | 24452     | .478     |                                |                            |
| WP x time        | 0.032    | 0.132     | 0.25     | 1273      | .806     |                                | 1.000                      |

*Note.* BP = between-person effect of the respective substance, WP = within-person effect.

Table S25

*DV: Agreeableness, IV: Soft drugs*

|                  | <i>B</i> | <i>se</i> | <i>t</i> | <i>df</i> | <i>p</i> | <i>p</i> <sub>one-tailed</sub> | <i>p</i> <sub>adjust</sub> |
|------------------|----------|-----------|----------|-----------|----------|--------------------------------|----------------------------|
| Intercept        | -0.290   | 0.014     | -20.21   | 13465     | <.001    |                                |                            |
| Age              | 0.005    | 0.000     | 9.80     | 11006     | <.001    |                                |                            |
| Age <sup>2</sup> | -0.010   | 0.002     | -4.66    | 20285     | <.001    |                                |                            |
| Sex              | 0.645    | 0.017     | 38.46    | 10635     | <.001    |                                |                            |
| Testing          | -0.021   | 0.003     | -8.35    | 30637     | <.001    |                                |                            |
| BP               | 0.030    | 0.054     | 0.56     | 12210     | .577     | .711                           | 1.000                      |
| WP               | 0.003    | 0.045     | 0.07     | 297       | .942     |                                | 1.000                      |
| Time             | 0.013    | 0.015     | 0.92     | 25705     | .355     |                                |                            |
| WP x time        | -0.266   | 0.154     | -1.72    | 1325      | .085     |                                | 1.000                      |

*Note.* BP = between-person effect of the respective substance, WP = within-person effect.

Table S26

*DV: Conscientiousness, IV: Soft drugs*

|                  | <i>B</i> | <i>se</i> | <i>t</i> | <i>df</i> | <i>p</i> | <i>p</i> <sub>one-tailed</sub> | <i>p</i> <sub>adjust</sub> |
|------------------|----------|-----------|----------|-----------|----------|--------------------------------|----------------------------|
| Intercept        | 0.022    | 0.015     | 1.47     | 13453     | .142     |                                |                            |
| Age              | 0.010    | 0.001     | 18.57    | 11151     | <.001    |                                |                            |
| Age <sup>2</sup> | -0.039   | 0.002     | -18.02   | 22214     | <.001    |                                |                            |
| Sex              | 0.160    | 0.018     | 9.15     | 10742     | <.001    |                                |                            |
| Testing          | -0.008   | 0.002     | -3.07    | 30982     | .002     |                                |                            |
| BP               | -0.533   | 0.055     | -9.61    | 12041     | <.001    | <.001                          | <.001                      |
| WP               | -0.087   | 0.040     | -2.16    | 247       | .032     |                                | .327                       |
| Time             | 0.017    | 0.014     | 1.22     | 25226     | .222     |                                |                            |
| WP x time        | 0.073    | 0.143     | 0.51     | 1052      | .609     |                                | 1.000                      |

*Note.* BP = between-person effect of the respective substance, WP = within-person effect.

Table S27

*DV: Neuroticism, IV: Soft drugs*

|                  | <i>B</i> | <i>se</i> | <i>t</i> | <i>df</i> | <i>p</i> | <i>p</i> <sub>one-tailed</sub> | <i>p</i> <sub>adjust</sub> |
|------------------|----------|-----------|----------|-----------|----------|--------------------------------|----------------------------|
| Intercept        | -0.150   | 0.015     | -10.07   | 13453     | <.001    |                                |                            |
| Age              | -0.005   | 0.001     | -9.69    | 11175     | <.001    |                                |                            |
| Age <sup>2</sup> | 0.008    | 0.002     | 3.84     | 22567     | <.001    |                                |                            |
| Sex              | 0.335    | 0.018     | 19.07    | 10758     | <.001    |                                |                            |
| Testing          | -0.026   | 0.002     | -10.69   | 31047     | <.001    |                                |                            |
| BP               | 0.383    | 0.056     | 6.89     | 12006     | <.001    |                                | <.001                      |
| WP               | 0.061    | 0.038     | 1.59     | 271       | .112     |                                | .963                       |
| Time             | -0.009   | 0.014     | -0.65    | 25146     | .514     |                                |                            |
| WP x time        | 0.011    | 0.139     | 0.08     | 1116      | .936     |                                | 1.000                      |

*Note.* BP = between-person effect of the respective substance, WP = within-person effect.

Table S28

*DV: Openness, IV: Soft drugs*

|                  | <i>B</i> | <i>se</i> | <i>t</i> | <i>df</i> | <i>p</i> | <i>p</i> <sub>one-tailed</sub> | <i>p</i> <sub>adjust</sub> |
|------------------|----------|-----------|----------|-----------|----------|--------------------------------|----------------------------|
| Intercept        | 0.166    | 0.015     | 11.09    | 13414     | <.001    |                                |                            |
| Age              | -0.008   | 0.001     | -16.01   | 11175     | <.001    |                                |                            |
| Age <sup>2</sup> | -0.023   | 0.002     | -10.45   | 23076     | <.001    |                                |                            |
| Sex              | -0.165   | 0.018     | -9.28    | 10749     | <.001    |                                |                            |
| Testing          | 0.001    | 0.002     | 0.49     | 31157     | .624     |                                |                            |
| BP               | 0.321    | 0.056     | 5.71     | 11928     | <.001    | <.001                          | <.001                      |
| WP               | -0.011   | 0.040     | -0.28    | 286       | .783     | .609                           | 1.000                      |
| Time             | -0.039   | 0.013     | -2.91    | 25020     | .004     |                                |                            |
| WP x time        | 0.071    | 0.140     | 0.51     | 1227      | .613     |                                | 1.000                      |

*Note.* BP = between-person effect of the respective substance, WP = within-person effect.

Table S29

*DV: Self-esteem, IV: Soft drugs*

|                  | <i>B</i> | <i>se</i> | <i>t</i> | <i>df</i> | <i>p</i> | <i>p</i> <sub>one-tailed</sub> | <i>p</i> <sub>adjust</sub> |
|------------------|----------|-----------|----------|-----------|----------|--------------------------------|----------------------------|
| Intercept        | 0.199    | 0.015     | 13.20    | 13349     | <.001    |                                |                            |
| Age              | 0.007    | 0.001     | 13.23    | 10945     | <.001    |                                |                            |
| Age <sup>2</sup> | -0.028   | 0.002     | -12.47   | 20676     | <.001    |                                |                            |
| Sex              | -0.160   | 0.018     | -9.09    | 10567     | <.001    |                                |                            |
| Testing          | -0.025   | 0.003     | -9.43    | 30688     | <.001    |                                |                            |
| BP               | -0.321   | 0.056     | -5.71    | 12051     | <.001    |                                | <.001                      |
| WP               | -0.063   | 0.046     | -1.37    | 280       | .171     |                                | 1.000                      |
| Time             | -0.006   | 0.015     | -0.43    | 25492     | .665     |                                |                            |
| WP x time        | 0.227    | 0.157     | 1.44     | 1240      | .149     |                                | 1.000                      |

*Note.* BP = between-person effect of the respective substance, WP = within-person effect.

Table S30

*DV: Life satisfaction, IV: Soft drugs*

|                  | <i>B</i> | <i>se</i> | <i>t</i> | <i>df</i> | <i>p</i> | <i>p</i> <sub>one-tailed</sub> | <i>p</i> <sub>adjust</sub> |
|------------------|----------|-----------|----------|-----------|----------|--------------------------------|----------------------------|
| Intercept        | -0.004   | 0.015     | -0.30    | 13505     | .766     |                                |                            |
| Age              | 0.002    | 0.001     | 2.93     | 10985     | .003     |                                |                            |
| Age <sup>2</sup> | 0.002    | 0.002     | 1.10     | 19730     | .273     |                                |                            |
| Sex              | 0.017    | 0.018     | 0.97     | 10627     | .333     |                                |                            |
| Testing          | -0.015   | 0.003     | -5.39    | 30534     | <.001    |                                |                            |
| BP               | -0.513   | 0.056     | -9.11    | 12303     | <.001    |                                | <.001                      |
| WP               | -0.039   | 0.055     | -0.72    | 296       | .473     | .237                           | 1.000                      |
| Time             | -0.044   | 0.016     | -2.80    | 25888     | .005     |                                |                            |
| WP x time        | 0.361    | 0.175     | 2.07     | 1544      | .039     |                                | 1.000                      |

*Note.* BP = between-person effect of the respective substance, WP = within-person effect.

Table S31

*DV: Extraversion, IV: Ecstasy*

|                  | <i>B</i> | <i>se</i> | <i>t</i> | <i>df</i> | <i>p</i> | <i>p</i> <sub>one-tailed</sub> | <i>p</i> <sub>adjust</sub> |
|------------------|----------|-----------|----------|-----------|----------|--------------------------------|----------------------------|
| Intercept        | -0.009   | 0.015     | -0.59    | 13351     | .558     |                                |                            |
| Age              | -0.003   | 0.001     | -6.46    | 11285     | <.001    |                                |                            |
| Age <sup>2</sup> | 0.008    | 0.002     | 3.87     | 25903     | <.001    |                                |                            |
| Sex              | 0.013    | 0.018     | 0.71     | 10781     | .481     |                                |                            |
| Testing          | -0.011   | 0.002     | -4.77    | 31709     | <.001    |                                |                            |
| BP               | 0.401    | 0.138     | 2.91     | 11730     | .004     | .002                           | .030                       |
| WP               | -0.067   | 0.080     | -0.85    | 90        | .400     |                                | 1.000                      |
| Time             | 0.009    | 0.012     | 0.75     | 24439     | .455     |                                |                            |
| WP x time        | -0.136   | 0.259     | -0.52    | 440       | .600     |                                | 1.000                      |

*Note.* BP = between-person effect of the respective substance, WP = within-person effect.

Table S32

*DV: Agreeableness, IV: Ecstasy*

|                  | <i>B</i> | <i>se</i> | <i>t</i> | <i>df</i> | <i>p</i> | <i>p</i> <sub>one-tailed</sub> | <i>p</i> <sub>adjust</sub> |
|------------------|----------|-----------|----------|-----------|----------|--------------------------------|----------------------------|
| Intercept        | -0.290   | 0.014     | -20.19   | 13480     | <.001    |                                |                            |
| Age              | 0.005    | 0.000     | 9.70     | 11020     | <.001    |                                |                            |
| Age <sup>2</sup> | -0.010   | 0.002     | -4.57    | 20265     | <.001    |                                |                            |
| Sex              | 0.644    | 0.017     | 38.49    | 10641     | <.001    |                                |                            |
| Testing          | -0.021   | 0.003     | -8.33    | 30565     | <.001    |                                |                            |
| BP               | -0.141   | 0.128     | -1.10    | 12213     | .273     |                                | 1.000                      |
| WP               | -0.011   | 0.088     | -0.12    | 92        | .904     |                                | 1.000                      |
| Time             | 0.014    | 0.015     | 0.94     | 25682     | .345     |                                |                            |
| WP x time        | -0.136   | 0.293     | -0.46    | 372       | .644     |                                | 1.000                      |

*Note.* BP = between-person effect of the respective substance, WP = within-person effect.

Table S33

*DV: Conscientiousness, IV: Ecstasy*

|                  | <i>B</i> | <i>se</i> | <i>t</i> | <i>df</i> | <i>p</i> | <i>p</i> <sub>one-tailed</sub> | <i>p</i> <sub>adjust</sub> |
|------------------|----------|-----------|----------|-----------|----------|--------------------------------|----------------------------|
| Intercept        | 0.019    | 0.015     | 1.25     | 13465     | .211     |                                |                            |
| Age              | 0.010    | 0.001     | 19.93    | 11169     | <.001    |                                |                            |
| Age <sup>2</sup> | -0.040   | 0.002     | -18.50   | 22277     | <.001    |                                |                            |
| Sex              | 0.173    | 0.018     | 9.87     | 10748     | <.001    |                                |                            |
| Testing          | -0.008   | 0.002     | -3.35    | 30918     | .001     |                                |                            |
| BP               | -0.556   | 0.133     | -4.17    | 12045     | <.001    | <.001                          | <.001                      |
| WP               | 0.014    | 0.086     | 0.16     | 78        | .872     |                                | 1.000                      |
| Time             | 0.018    | 0.014     | 1.32     | 25189     | .188     |                                |                            |
| WP x time        | -0.097   | 0.284     | -0.34    | 348       | .733     |                                | 1.000                      |

*Note.* BP = between-person effect of the respective substance, WP = within-person effect.

Table S34

*DV: Neuroticism, IV: Ecstasy*

|                  | <i>B</i> | <i>se</i> | <i>t</i> | <i>df</i> | <i>p</i> | <i>p</i> <sub>one-tailed</sub> | <i>p</i> <sub>adjust</sub> |
|------------------|----------|-----------|----------|-----------|----------|--------------------------------|----------------------------|
| Intercept        | -0.147   | 0.015     | -9.88    | 13464     | <.001    |                                |                            |
| Age              | -0.006   | 0.001     | -10.72   | 11191     | <.001    |                                |                            |
| Age <sup>2</sup> | 0.009    | 0.002     | 4.11     | 22601     | <.001    |                                |                            |
| Sex              | 0.326    | 0.018     | 18.56    | 10763     | <.001    |                                |                            |
| Testing          | -0.025   | 0.002     | -10.40   | 30980     | <.001    |                                |                            |
| BP               | 0.329    | 0.134     | 2.46     | 12025     | .014     |                                | .175                       |
| WP               | 0.059    | 0.086     | 0.69     | 92        | .493     |                                | 1.000                      |
| Time             | -0.009   | 0.014     | -0.68    | 25127     | .499     |                                |                            |
| WP x time        | 0.155    | 0.282     | 0.55     | 410       | .584     |                                | 1.000                      |

*Note.* BP = between-person effect of the respective substance, WP = within-person effect.

Table S35

*DV: Openness, IV: Ecstasy*

|                  | <i>B</i> | <i>se</i> | <i>t</i> | <i>df</i> | <i>p</i> | <i>p</i> <sub>one-tailed</sub> | <i>p</i> <sub>adjust</sub> |
|------------------|----------|-----------|----------|-----------|----------|--------------------------------|----------------------------|
| Intercept        | 0.169    | 0.015     | 11.24    | 13428     | <.001    |                                |                            |
| Age              | -0.009   | 0.001     | -16.86   | 11191     | <.001    |                                |                            |
| Age <sup>2</sup> | -0.022   | 0.002     | -10.25   | 23080     | <.001    |                                |                            |
| Sex              | -0.172   | 0.018     | -9.71    | 10751     | <.001    |                                |                            |
| Testing          | 0.002    | 0.002     | 0.67     | 31081     | .500     |                                |                            |
| BP               | 0.390    | 0.135     | 2.90     | 12069     | .004     |                                | .060                       |
| WP               | 0.054    | 0.083     | 0.66     | 101       | .514     |                                | 1.000                      |
| Time             | -0.039   | 0.013     | -2.87    | 24992     | .004     |                                |                            |
| WP x time        | -0.403   | 0.275     | -1.46    | 424       | .144     |                                | 1.000                      |

*Note.* BP = between-person effect of the respective substance, WP = within-person effect.

Table S36

*DV: Self-esteem, IV: Ecstasy*

|                  | <i>B</i> | <i>se</i> | <i>t</i> | <i>df</i> | <i>p</i> | <i>p</i> <sub>one-tailed</sub> | <i>p</i> <sub>adjust</sub> |
|------------------|----------|-----------|----------|-----------|----------|--------------------------------|----------------------------|
| Intercept        | 0.197    | 0.015     | 13.05    | 13371     | <.001    |                                |                            |
| Age              | 0.007    | 0.001     | 14.00    | 10967     | <.001    |                                |                            |
| Age <sup>2</sup> | -0.029   | 0.002     | -12.71   | 20677     | <.001    |                                |                            |
| Sex              | -0.153   | 0.018     | -8.72    | 10578     | <.001    |                                |                            |
| Testing          | -0.025   | 0.003     | -9.57    | 30617     | <.001    |                                |                            |
| BP               | -0.460   | 0.135     | -3.41    | 12103     | .001     |                                | .013                       |
| WP               | -0.098   | 0.085     | -1.15    | 88        | .255     |                                | 1.000                      |
| Time             | -0.006   | 0.015     | -0.40    | 25466     | .686     |                                |                            |
| WP x time        | -0.174   | 0.293     | -0.59    | 325       | .552     |                                | 1.000                      |

*Note.* BP = between-person effect of the respective substance, WP = within-person effect.

Table S37

*DV: Life satisfaction, IV: Ecstasy*

|                  | <i>B</i> | <i>se</i> | <i>t</i> | <i>df</i> | <i>p</i> | <i>p</i> <sub>one-tailed</sub> | <i>p</i> <sub>adjust</sub> |
|------------------|----------|-----------|----------|-----------|----------|--------------------------------|----------------------------|
| Intercept        | -0.008   | 0.015     | -0.53    | 13525     | .599     |                                |                            |
| Age              | 0.002    | 0.001     | 4.30     | 11006     | <.001    |                                |                            |
| Age <sup>2</sup> | 0.001    | 0.002     | 0.65     | 19755     | .515     |                                |                            |
| Sex              | 0.030    | 0.018     | 1.70     | 10635     | .089     |                                |                            |
| Testing          | -0.016   | 0.003     | -5.70    | 30496     | <.001    |                                |                            |
| BP               | -0.325   | 0.135     | -2.40    | 12210     | .016     |                                | .191                       |
| WP               | 0.031    | 0.085     | 0.36     | 84        | .717     |                                | 1.000                      |
| Time             | -0.043   | 0.016     | -2.73    | 25854     | .006     |                                |                            |
| WP x time        | -0.199   | 0.299     | -0.67    | 280       | .506     |                                | 1.000                      |

*Note.* BP = between-person effect of the respective substance, WP = within-person effect.

Table S38

*DV: Extraversion, IV: Hallucinogens*

|                  | <i>B</i> | <i>se</i> | <i>t</i> | <i>df</i> | <i>p</i> | <i>p</i> <sub>one-tailed</sub> | <i>p</i> <sub>adjust</sub> |
|------------------|----------|-----------|----------|-----------|----------|--------------------------------|----------------------------|
| Intercept        | -0.008   | 0.015     | -0.52    | 13357     | .602     |                                |                            |
| Age              | -0.004   | 0.001     | -6.82    | 11284     | <.001    |                                |                            |
| Age <sup>2</sup> | 0.008    | 0.002     | 3.94     | 25973     | <.001    |                                |                            |
| Sex              | 0.010    | 0.018     | 0.55     | 10778     | .579     |                                |                            |
| Testing          | -0.010   | 0.002     | -4.62    | 31686     | <.001    |                                |                            |
| BP               | -0.285   | 0.276     | -1.03    | 12270     | .301     |                                | 1.000                      |
| WP               | 0.011    | 0.097     | 0.12     | 24100     | .906     |                                | 1.000                      |
| Time             | 0.009    | 0.012     | 0.74     | 24444     | .460     |                                |                            |
| WP x time        | -0.115   | 0.523     | -0.22    | 25559     | .826     |                                | 1.000                      |

*Note.* BP = between-person effect of the respective substance, WP = within-person effect.

Table S39

*DV: Agreeableness, IV: Hallucinogens*

|                  | <i>B</i> | <i>se</i> | <i>t</i> | <i>df</i> | <i>p</i> | <i>p</i> <sub>one-tailed</sub> | <i>p</i> <sub>adjust</sub> |
|------------------|----------|-----------|----------|-----------|----------|--------------------------------|----------------------------|
| Intercept        | -0.290   | 0.014     | -20.17   | 13487     | <.001    |                                |                            |
| Age              | 0.005    | 0.000     | 9.68     | 11019     | <.001    |                                |                            |
| Age <sup>2</sup> | -0.010   | 0.002     | -4.55    | 20289     | <.001    |                                |                            |
| Sex              | 0.643    | 0.017     | 38.45    | 10638     | <.001    |                                |                            |
| Testing          | -0.021   | 0.003     | -8.29    | 30539     | <.001    |                                |                            |
| BP               | -0.594   | 0.260     | -2.28    | 5999      | .023     |                                | .255                       |
| WP               | -0.268   | 0.161     | -1.66    | 27        | .108     |                                | .944                       |
| Time             | 0.013    | 0.015     | 0.92     | 25695     | .356     |                                |                            |
| WP x time        | 0.219    | 0.704     | 0.31     | 237       | .756     |                                | 1.000                      |

*Note.* BP = between-person effect of the respective substance, WP = within-person effect.

Table S40

*DV: Conscientiousness, IV: Hallucinogens*

|                  | <i>B</i> | <i>se</i> | <i>t</i> | <i>df</i> | <i>p</i> | <i>p</i> <sub>one-tailed</sub> | <i>p</i> <sub>adjust</sub> |
|------------------|----------|-----------|----------|-----------|----------|--------------------------------|----------------------------|
| Intercept        | 0.019    | 0.015     | 1.24     | 13469     | .213     |                                |                            |
| Age              | 0.010    | 0.001     | 20.26    | 11170     | <.001    |                                |                            |
| Age <sup>2</sup> | -0.040   | 0.002     | -18.55   | 22324     | <.001    |                                |                            |
| Sex              | 0.174    | 0.018     | 9.93     | 10745     | <.001    |                                |                            |
| Testing          | -0.009   | 0.002     | -3.43    | 30896     | .001     |                                |                            |
| BP               | -0.529   | 0.269     | -1.97    | 7046      | .049     |                                | .476                       |
| WP               | -0.420   | 0.138     | -3.05    | 30        | .005     |                                | .073                       |
| Time             | 0.018    | 0.014     | 1.27     | 25192     | .205     |                                |                            |
| WP x time        | 0.161    | 0.639     | 0.25     | 158       | .801     |                                | 1.000                      |

*Note.* BP = between-person effect of the respective substance, WP = within-person effect.

Table S41

*DV: Neuroticism, IV: Hallucinogens*

|                  | <i>B</i> | <i>se</i> | <i>t</i> | <i>df</i> | <i>p</i> | <i>p</i> <sub>one-tailed</sub> | <i>p</i> <sub>adjust</sub> |
|------------------|----------|-----------|----------|-----------|----------|--------------------------------|----------------------------|
| Intercept        | -0.147   | 0.015     | -9.86    | 13473     | <.001    |                                |                            |
| Age              | -0.006   | 0.001     | -10.83   | 11191     | <.001    |                                |                            |
| Age <sup>2</sup> | 0.009    | 0.002     | 4.11     | 22646     | <.001    |                                |                            |
| Sex              | 0.326    | 0.018     | 18.55    | 10760     | <.001    |                                |                            |
| Testing          | -0.025   | 0.002     | -10.39   | 30957     | <.001    |                                |                            |
| BP               | 0.660    | 0.268     | 2.47     | 12834     | .014     |                                | .175                       |
| WP               | 0.030    | 0.108     | 0.28     | 24729     | .779     |                                | 1.000                      |
| Time             | -0.010   | 0.014     | -0.70    | 25134     | .484     |                                |                            |
| WP x time        | 0.240    | 0.578     | 0.42     | 26552     | .678     |                                | 1.000                      |

*Note.* BP = between-person effect of the respective substance, WP = within-person effect.

Table S42

*DV: Openness, IV: Hallucinogens*

|                  | <i>B</i> | <i>se</i> | <i>t</i> | <i>df</i> | <i>p</i> | <i>p</i> <sub>one-tailed</sub> | <i>p</i> <sub>adjust</sub> |
|------------------|----------|-----------|----------|-----------|----------|--------------------------------|----------------------------|
| Intercept        | 0.169    | 0.015     | 11.28    | 13434     | <.001    |                                |                            |
| Age              | -0.009   | 0.001     | -17.20   | 11188     | <.001    |                                |                            |
| Age <sup>2</sup> | -0.022   | 0.002     | -10.19   | 23129     | <.001    |                                |                            |
| Sex              | -0.174   | 0.018     | -9.82    | 10746     | <.001    |                                |                            |
| Testing          | 0.002    | 0.002     | 0.76     | 31054     | .445     |                                |                            |
| BP               | -0.057   | 0.270     | -0.21    | 12714     | .834     |                                | 1.000                      |
| WP               | -0.014   | 0.106     | -0.13    | 24607     | .897     | .551                           | 1.000                      |
| Time             | -0.038   | 0.013     | -2.85    | 25000     | .004     |                                |                            |
| WP x time        | 0.051    | 0.572     | 0.09     | 26374     | .929     |                                | 1.000                      |

*Note.* BP = between-person effect of the respective substance, WP = within-person effect.

Table S43

*DV: Self-esteem, IV: Hallucinogens*

|                  | <i>B</i> | <i>se</i> | <i>t</i> | <i>df</i> | <i>p</i> | <i>p</i> <sub>one-tailed</sub> | <i>p</i> <sub>adjust</sub> |
|------------------|----------|-----------|----------|-----------|----------|--------------------------------|----------------------------|
| Intercept        | 0.196    | 0.015     | 13.02    | 13377     | <.001    |                                |                            |
| Age              | 0.007    | 0.001     | 14.18    | 10963     | <.001    |                                |                            |
| Age <sup>2</sup> | -0.028   | 0.002     | -12.67   | 20719     | <.001    |                                |                            |
| Sex              | -0.153   | 0.018     | -8.69    | 10572     | <.001    |                                |                            |
| Testing          | -0.026   | 0.003     | -9.65    | 30592     | <.001    |                                |                            |
| BP               | -0.869   | 0.270     | -3.21    | 13073     | .001     |                                | .024                       |
| WP               | -0.095   | 0.118     | -0.80    | 25014     | .422     |                                | 1.000                      |
| Time             | -0.006   | 0.015     | -0.42    | 25481     | .673     |                                |                            |
| WP x time        | -0.288   | 0.629     | -0.46    | 27087     | .648     |                                | 1.000                      |

*Note.* BP = between-person effect of the respective substance, WP = within-person effect.

Table S44

*DV: Life satisfaction, IV: Hallucinogens*

|                  | <i>B</i> | <i>se</i> | <i>t</i> | <i>df</i> | <i>p</i> | <i>p</i> <sub>one-tailed</sub> | <i>p</i> <sub>adjust</sub> |
|------------------|----------|-----------|----------|-----------|----------|--------------------------------|----------------------------|
| Intercept        | -0.008   | 0.015     | -0.55    | 13530     | .580     |                                |                            |
| Age              | 0.002    | 0.001     | 4.44     | 11004     | <.001    |                                |                            |
| Age <sup>2</sup> | 0.002    | 0.002     | 0.67     | 19779     | .501     |                                |                            |
| Sex              | 0.031    | 0.018     | 1.74     | 10628     | .081     |                                |                            |
| Testing          | -0.016   | 0.003     | -5.78    | 30478     | <.001    |                                |                            |
| BP               | -0.490   | 0.272     | -1.80    | 6155      | .072     |                                | .677                       |
| WP               | 0.087    | 0.136     | 0.64     | 20        | .529     |                                | 1.000                      |
| Time             | -0.044   | 0.016     | -2.77    | 25879     | .006     |                                |                            |
| WP x time        | -1.074   | 0.678     | -1.58    | 73        | .118     |                                | 1.000                      |

*Note.* BP = between-person effect of the respective substance, WP = within-person effect.



Table S45

*DV: Extraversion, IV: Hard drugs*

|                  | <i>B</i> | <i>se</i> | <i>t</i> | <i>df</i> | <i>p</i> | <i>p</i> <sub>one-tailed</sub> | <i>p</i> <sub>adjust</sub> |
|------------------|----------|-----------|----------|-----------|----------|--------------------------------|----------------------------|
| Intercept        | -0.009   | 0.015     | -0.59    | 13351     | .552     |                                |                            |
| Age              | -0.004   | 0.001     | -6.56    | 11286     | <.001    |                                |                            |
| Age <sup>2</sup> | 0.008    | 0.002     | 3.94     | 25931     | <.001    |                                |                            |
| Sex              | 0.013    | 0.018     | 0.69     | 10780     | .491     |                                |                            |
| Testing          | -0.011   | 0.002     | -4.77    | 31690     | <.001    |                                |                            |
| BP               | 0.300    | 0.138     | 2.18     | 11344     | .029     |                                | .308                       |
| WP               | -0.113   | 0.102     | -1.11    | 70        | .273     |                                | 1.000                      |
| Time             | 0.010    | 0.012     | 0.83     | 24431     | .405     |                                |                            |
| WP x time        | 0.222    | 0.311     | 0.71     | 346       | .477     |                                | 1.000                      |

*Note.* BP = between-person effect of the respective substance, WP = within-person effect.

Table S46

*DV: Agreeableness, IV: Hard drugs*

|                  | <i>B</i> | <i>se</i> | <i>t</i> | <i>df</i> | <i>p</i> | <i>p</i> <sub>one-tailed</sub> | <i>p</i> <sub>adjust</sub> |
|------------------|----------|-----------|----------|-----------|----------|--------------------------------|----------------------------|
| Intercept        | -0.289   | 0.014     | -20.11   | 13484     | <.001    |                                |                            |
| Age              | 0.005    | 0.000     | 9.57     | 11023     | <.001    |                                |                            |
| Age <sup>2</sup> | -0.010   | 0.002     | -4.64    | 20272     | <.001    |                                |                            |
| Sex              | 0.641    | 0.017     | 38.37    | 10643     | <.001    |                                |                            |
| Testing          | -0.021   | 0.003     | -8.27    | 30547     | <.001    |                                |                            |
| BP               | -0.398   | 0.127     | -3.12    | 11434     | .002     |                                | .030                       |
| WP               | -0.375   | 0.113     | -3.32    | 68        | .001     |                                | .025                       |
| Time             | 0.014    | 0.015     | 0.95     | 25692     | .341     |                                |                            |
| WP x time        | 1.199    | 0.358     | 3.35     | 297       | .001     |                                | .199                       |

*Note.* BP = between-person effect of the respective substance, WP = within-person effect.

Table S47

*DV: Conscientiousness, IV: Hard drugs*

|                  | <i>B</i> | <i>se</i> | <i>t</i> | <i>df</i> | <i>p</i> | <i>p</i> <sub>one-tailed</sub> | <i>p</i> <sub>adjust</sub> |
|------------------|----------|-----------|----------|-----------|----------|--------------------------------|----------------------------|
| Intercept        | 0.019    | 0.015     | 1.31     | 13474     | .191     |                                |                            |
| Age              | 0.010    | 0.001     | 19.89    | 11175     | <.001    |                                |                            |
| Age <sup>2</sup> | -0.040   | 0.002     | -18.54   | 22281     | <.001    |                                |                            |
| Sex              | 0.171    | 0.018     | 9.77     | 10751     | <.001    |                                |                            |
| Testing          | -0.008   | 0.002     | -3.30    | 30903     | .001     |                                |                            |
| BP               | -0.796   | 0.132     | -6.04    | 12002     | <.001    | <.001                          | <.001                      |
| WP               | -0.040   | 0.074     | -0.54    | 24212     | .588     |                                | 1.000                      |
| Time             | 0.017    | 0.014     | 1.25     | 25212     | .211     |                                |                            |
| WP x time        | 0.428    | 0.278     | 1.54     | 24516     | .123     |                                | 1.000                      |

*Note.* BP = between-person effect of the respective substance, WP = within-person effect.

Table S48

*DV: Neuroticism, IV: Hard drugs*

|                  | <i>B</i> | <i>se</i> | <i>t</i> | <i>df</i> | <i>p</i> | <i>p</i> <sub>one-tailed</sub> | <i>p</i> <sub>adjust</sub> |
|------------------|----------|-----------|----------|-----------|----------|--------------------------------|----------------------------|
| Intercept        | -0.148   | 0.015     | -9.96    | 13465     | <.001    |                                |                            |
| Age              | -0.005   | 0.001     | -10.58   | 11192     | <.001    |                                |                            |
| Age <sup>2</sup> | 0.009    | 0.002     | 4.17     | 22594     | <.001    |                                |                            |
| Sex              | 0.328    | 0.018     | 18.69    | 10763     | <.001    |                                |                            |
| Testing          | -0.026   | 0.002     | -10.49   | 30964     | <.001    |                                |                            |
| BP               | 0.623    | 0.132     | 4.71     | 11214     | <.001    | <.001                          | <.001                      |
| WP               | 0.143    | 0.098     | 1.45     | 65        | .151     |                                | 1.000                      |
| Time             | -0.009   | 0.014     | -0.67    | 25129     | .501     |                                |                            |
| WP x time        | -0.169   | 0.319     | -0.53    | 241       | .596     |                                | 1.000                      |

*Note.* BP = between-person effect of the respective substance, WP = within-person effect.

Table S49

*DV: Openness, IV: Hard drugs*

|                  | <i>B</i> | <i>se</i> | <i>t</i> | <i>df</i> | <i>p</i> | <i>p</i> <sub>one-tailed</sub> | <i>p</i> <sub>adjust</sub> |
|------------------|----------|-----------|----------|-----------|----------|--------------------------------|----------------------------|
| Intercept        | 0.169    | 0.015     | 11.26    | 13433     | <.001    |                                |                            |
| Age              | -0.009   | 0.001     | -17.00   | 11193     | <.001    |                                |                            |
| Age <sup>2</sup> | -0.022   | 0.002     | -10.24   | 23079     | <.001    |                                |                            |
| Sex              | -0.173   | 0.018     | -9.75    | 10752     | <.001    |                                |                            |
| Testing          | 0.002    | 0.002     | 0.72     | 31071     | .475     |                                |                            |
| BP               | 0.275    | 0.134     | 2.05     | 11453     | .040     |                                | .400                       |
| WP               | -0.121   | 0.091     | -1.33    | 81        | .186     |                                | 1.000                      |
| Time             | -0.038   | 0.013     | -2.83    | 25001     | .005     |                                |                            |
| WP x time        | 0.511    | 0.310     | 1.65     | 293       | .101     |                                | 1.000                      |

*Note.* BP = between-person effect of the respective substance, WP = within-person effect.

Table S50

*DV: Self-esteem, IV: Hard drugs*

|                  | <i>B</i> | <i>se</i> | <i>t</i> | <i>df</i> | <i>p</i> | <i>p</i> <sub>one-tailed</sub> | <i>p</i> <sub>adjust</sub> |
|------------------|----------|-----------|----------|-----------|----------|--------------------------------|----------------------------|
| Intercept        | 0.198    | 0.015     | 13.13    | 13372     | <.001    |                                |                            |
| Age              | 0.007    | 0.001     | 13.86    | 10966     | <.001    |                                |                            |
| Age <sup>2</sup> | -0.028   | 0.002     | -12.67   | 20663     | <.001    |                                |                            |
| Sex              | -0.156   | 0.018     | -8.86    | 10578     | <.001    |                                |                            |
| Testing          | -0.025   | 0.003     | -9.58    | 30596     | <.001    |                                |                            |
| BP               | -0.831   | 0.134     | -6.22    | 11387     | <.001    |                                | <.001                      |
| WP               | -0.160   | 0.115     | -1.39    | 64        | .168     |                                | 1.000                      |
| Time             | -0.005   | 0.015     | -0.36    | 25486     | .721     |                                |                            |
| WP x time        | -0.245   | 0.365     | -0.67    | 278       | .502     |                                | 1.000                      |

*Note.* BP = between-person effect of the respective substance, WP = within-person effect.

Table S51

*DV: Life satisfaction, IV: Hard drugs*

|                  | <i>B</i> | <i>se</i> | <i>t</i> | <i>df</i> | <i>p</i> | <i>p</i> <sub>one-tailed</sub> | <i>p</i> <sub>adjust</sub> |
|------------------|----------|-----------|----------|-----------|----------|--------------------------------|----------------------------|
| Intercept        | -0.007   | 0.015     | -0.46    | 13535     | .646     |                                |                            |
| Age              | 0.002    | 0.001     | 4.06     | 11010     | <.001    |                                |                            |
| Age <sup>2</sup> | 0.002    | 0.002     | 0.67     | 19755     | .501     |                                |                            |
| Sex              | 0.027    | 0.018     | 1.55     | 10639     | .121     |                                |                            |
| Testing          | -0.016   | 0.003     | -5.64    | 30488     | <.001    |                                |                            |
| BP               | -0.780   | 0.133     | -5.85    | 12266     | <.001    | <.001                          | <.001                      |
| WP               | -0.022   | 0.085     | -0.26    | 24737     | .793     |                                | 1.000                      |
| Time             | -0.044   | 0.016     | -2.77    | 25894     | .006     |                                |                            |
| WP x time        | 0.259    | 0.317     | 0.82     | 25203     | .413     |                                | 1.000                      |

*Note.* BP = between-person effect of the respective substance, WP = within-person effect.

**Random slopes**

Table S52

*Random slopes of the within-person effects*

|               | E                               | A                               | C                               | N                               | O                               | LS                              | SE                              |
|---------------|---------------------------------|---------------------------------|---------------------------------|---------------------------------|---------------------------------|---------------------------------|---------------------------------|
| Smoking       | $\sigma = 0.283$<br>$p < .001$  | $\sigma = 0.397$<br>$p < .001$  | $\sigma = 0.355$<br>$p < .001$  | $\sigma = 0.283$<br>$p < .001$  | $\sigma = 0.225$<br>$p = .004$  | $\sigma = 0.395$<br>$p < .001$  | $\sigma = 0.315$<br>$p < .001$  |
| Alcohol heavy | $\sigma = 0.002$<br>$p = 1.000$ | $\sigma = 0.060$<br>$p = 1.000$ | $\sigma = 0.011$<br>$p = 1.000$ | $\sigma = 0.012$<br>$p = 1.000$ | $\sigma = 0.000$<br>$p = 1.000$ | $\sigma = 0.008$<br>$p = 1.000$ | $\sigma = 0.035$<br>$p = 1.000$ |
| Sedatives     | $\sigma = 0.316$<br>$p < .001$  | $\sigma = 0.263$<br>$p = .051$  | $\sigma = 0.243$<br>$p = .088$  | $\sigma = 0.338$<br>$p < .001$  | $\sigma = 0.275$<br>$p = .003$  | $\sigma = 0.561$<br>$p < .001$  | $\sigma = 0.251$<br>$p = .090$  |
| Soft drugs    | $\sigma = 0.377$<br>$p < .001$  | $\sigma = 0.412$<br>$p < .001$  | $\sigma = 0.320$<br>$p = .038$  | $\sigma = 0.263$<br>$p = .276$  | $\sigma = 0.339$<br>$p = .002$  | $\sigma = 0.618$<br>$p < .001$  | $\sigma = 0.419$<br>$p < .001$  |
| XTC           | $\sigma = 0.515$<br>$p < .001$  | $\sigma = 0.534$<br>$p = .002$  | $\sigma = 0.522$<br>$p = .011$  | $\sigma = 0.543$<br>$p < .001$  | $\sigma = 0.499$<br>$p < .001$  | $\sigma = 0.420$<br>$p = .233$  | $\sigma = 0.466$<br>$p = .074$  |
| Hallucinogens | $\sigma = 0.309$<br>$p = 1.000$ | $\sigma = 0.630$<br>$p = .157$  | $\sigma = 0.548$<br>$p = .145$  | $\sigma = 0.357$<br>$p = 1.000$ | $\sigma = 0.237$<br>$p = .902$  | $\sigma = 0.438$<br>$p = .304$  | $\sigma = 0.314$<br>$p = 1.000$ |
| Hard drugs    | $\sigma = 0.621$<br>$p < .001$  | $\sigma = 0.658$<br>$p < .001$  | $\sigma = 0.304$<br>$p = 1.000$ | $\sigma = 0.521$<br>$p = .016$  | $\sigma = 0.437$<br>$p = .009$  | $\sigma = 0.441$<br>$p = .424$  | $\sigma = 0.662$<br>$p < .001$  |

*Note.* Depicted are the random slopes of the within-person effects of substance use on personality. The standard deviation of the random slope is indicated by  $\sigma$  and  $p$  indicates the  $p$ -value for the fit improvement when random slopes are modelled (adjusted to control the false discovery rate). E = extraversion, A = agreeableness, C = conscientiousness, N = neuroticism, O = openness, SE = self-esteem, LS = life satisfaction.

**Sensitivity Analyses**

Table S53

*Results of the interactions between user-status and the within-person effects of substance use*

|               | E                                                                  | A                                                                    | C                                                                  | N                                                                    | O                                                                    | LS                                                                   | SE                                                                 |
|---------------|--------------------------------------------------------------------|----------------------------------------------------------------------|--------------------------------------------------------------------|----------------------------------------------------------------------|----------------------------------------------------------------------|----------------------------------------------------------------------|--------------------------------------------------------------------|
| Smoking       | $B = 0.029$<br>[-0.096, 0.154]<br>$t(1224) = 0.68$<br>$p = 1.000$  | $B = -0.001$<br>[-0.156, 0.154]<br>$t(1254) = -0.03$<br>$p = 1.000$  | $B = 0.032$<br>[-0.113, 0.177]<br>$t(1231) = 0.65$<br>$p = 1.000$  | $B = -0.092$<br>[-0.229, 0.044]<br>$t(1245) = -2.01$<br>$p = 1.000$  | $B = 0.029$<br>[-0.102, 0.159]<br>$t(1342) = 0.66$<br>$p = 1.000$    | $B = -0.016$<br>[-0.180, 0.147]<br>$t(1255) = -0.29$<br>$p = 1.000$  | $B = 0.039$<br>[-0.111, 0.188]<br>$t(1262) = 0.77$<br>$p = 1.000$  |
| Alcohol heavy | $B = 0.017$<br>[-0.105, 0.138]<br>$t(22725) = 0.41$<br>$p = 1.000$ | $B = -0.032$<br>[-0.177, 0.113]<br>$t(23204) = -0.66$<br>$p = 1.000$ | $B = 0.097$<br>[-0.040, 0.235]<br>$t(23027) = 2.11$<br>$p = 1.000$ | $B = -0.094$<br>[-0.229, 0.042]<br>$t(23001) = -2.05$<br>$p = 1.000$ | $B = -0.021$<br>[-0.155, 0.113]<br>$t(22939) = -0.47$<br>$p = 1.000$ | $B = 0.084$<br>[-0.073, 0.242]<br>$t(23290) = 1.59$<br>$p = 1.000$   | $B = 0.044$<br>[-0.105, 0.192]<br>$t(23057) = 0.87$<br>$p = 1.000$ |
| Sedatives     | $B = 0.005$<br>[-0.150, 0.161]<br>$t(426) = 0.10$<br>$p = 1.000$   | $B = -0.069$<br>[-0.238, 0.101]<br>$t(462) = -1.20$<br>$p = 1.000$   | $B = 0.076$<br>[-0.084, 0.235]<br>$t(431) = 1.41$<br>$p = 1.000$   | $B = -0.051$<br>[-0.221, 0.121]<br>$t(458) = -0.88$<br>$p = 1.000$   | $B = -0.025$<br>[-0.186, 0.135]<br>$t(452) = -0.47$<br>$p = 1.000$   | $B = -0.052$<br>[-0.278, 0.174]<br>$t(474) = -0.68$<br>$p = 1.000$   | $B = 0.092$<br>[-0.079, 0.264]<br>$t(465) = 1.60$<br>$p = 1.000$   |
| Soft drugs    | $B = 0.059$<br>[-0.170, 0.289]<br>$t(261) = 0.77$<br>$p = 1.000$   | $B = -0.011$<br>[-0.275, 0.254]<br>$t(285) = -0.12$<br>$p = 1.000$   | $B = 0.026$<br>[-0.215, 0.265]<br>$t(239) = 0.32$<br>$p = 1.000$   | $B = -0.008$<br>[-0.233, 0.218]<br>$t(264) = -0.11$<br>$p = 1.000$   | $B = 0.086$<br>[-0.150, 0.321]<br>$t(275) = 1.08$<br>$p = 1.000$     | $B = -0.069$<br>[-0.396, 0.255]<br>$t(280) = -0.64$<br>$p = 1.000$   | $B = -0.039$<br>[-0.311, 0.232]<br>$t(268) = -0.43$<br>$p = 1.000$ |
| Ecstasy       | $B = 0.012$<br>[-0.473, 0.492]<br>$t(81) = 0.08$<br>$p = 1.000$    | $B = 0.423$<br>[-0.090, 0.934]<br>$t(79) = 2.48$<br>$p = 1.000$      | $B = 0.219$<br>[-0.296, 0.732]<br>$t(69) = 1.29$<br>$p = 1.000$    | $B = 0.005$<br>[-0.517, 0.526]<br>$t(82) = 0.03$<br>$p = 1.000$      | $B = 0.187$<br>[-0.313, 0.678]<br>$t(88) = 1.14$<br>$p = 1.000$      | $B = 0.129$<br>[-0.391, 0.638]<br>$t(74) = 0.76$<br>$p = 1.000$      | $B = 0.246$<br>[-0.269, 0.749]<br>$t(74) = 1.47$<br>$p = 1.000$    |
| Hallucinogens | $B = 0.389$<br>[-0.299, 1.077]<br>$t(22735) = 1.68$<br>$p = 1.000$ | $B = 0.213$<br>[-1.046, 1.507]<br>$t(21) = 0.52$<br>$p = 1.000$      | $B = 0.093$<br>[-1.045, 1.195]<br>$t(25) = 0.26$<br>$p = 1.000$    | $B = 0.384$<br>[-0.385, 1.153]<br>$t(22978) = 1.48$<br>$p = 1.000$   | $B = 0.036$<br>[-0.723, 0.796]<br>$t(22919) = 0.14$<br>$p = 1.000$   | $B = -0.501$<br>[-1.394, 0.391]<br>$t(23186) = -1.67$<br>$p = 1.000$ | $B = 0.007$<br>[-0.837, 0.851]<br>$t(22989) = 0.03$<br>$p = 1.000$ |

|            |                   |                   |                   |                   |                   |                    |                   |
|------------|-------------------|-------------------|-------------------|-------------------|-------------------|--------------------|-------------------|
|            | $B = -0.356$      | $B = -0.193$      | $B = 0.040$       | $B = -0.060$      | $B = 0.006$       | $B = -0.036$       | $B = -0.178$      |
|            | $[-0.957, 0.244]$ | $[-0.875, 0.480]$ | $[-0.397, 0.478]$ | $[-0.646, 0.538]$ | $[-0.545, 0.556]$ | $[-0.535, 0.463]$  | $[-0.885, 0.506]$ |
| Hard drugs | $t(68) = -1.78$   | $t(65) = -0.86$   | $t(24231) = 0.27$ | $t(61) = -0.31$   | $t(80) = 0.03$    | $t(24745) = -0.22$ | $t(61) = -0.78$   |
|            | $p = 1.000$        | $p = 1.000$       |

*Note.* Depicted are the interactions between the within-person effects and user status (“1” if participants reported using a given substance at two consecutive drug assessments and “0” otherwise). The reported  $p$ -values were corrected to control the false discovery rate. 99.7% confidence intervals (corresponding to the adjusted significance threshold) are shown in parentheses. E = extraversion, A = agreeableness, C = conscientiousness, N = neuroticism, O = openness, LS = life satisfaction, SE = self-esteem.

Table S54

*Results of the multilevel models with the overall use index and the two alcohol indices predicting personality: Between-person effects.*

|                        | E                                                                                   | A                                                                   | C                                                                                      | N                                                                                  | O                                                                                  | LS                                                                                     | SE                                                                                     |
|------------------------|-------------------------------------------------------------------------------------|---------------------------------------------------------------------|----------------------------------------------------------------------------------------|------------------------------------------------------------------------------------|------------------------------------------------------------------------------------|----------------------------------------------------------------------------------------|----------------------------------------------------------------------------------------|
| Overall use            | $B = 0.066$<br>[-0.294, 0.426]<br>$t(11433) = 0.54$<br>$p = .586$                   | $B = -0.198$<br>[-0.532, 0.136]<br>$t(11680) = -1.76$<br>$p = .078$ | <b><math>B = -0.929</math></b><br>[-1.275, -0.583]<br>$t(11672) = -7.97$<br>$p < .001$ | <b><math>B = 0.729</math></b><br>[0.383, 1.076]<br>$t(11672) = 6.24$<br>$p < .001$ | $B = 0.298$<br>[-0.052, 0.647]<br>$t(11883) = 2.53$<br>$p = .011$                  | <b><math>B = -0.826</math></b><br>[-1.177, -0.475]<br>$t(11485) = -6.98$<br>$p < .001$ | <b><math>B = -0.835</math></b><br>[-1.184, -0.486]<br>$t(11665) = -7.09$<br>$p < .001$ |
| Alcohol frequency      | <b><math>B = 0.115</math></b><br>[0.034, 0.195]<br>$t(10755) = 4.22$<br>$p < .001$  | $B = -0.006$<br>[-0.079, 0.068]<br>$t(10566) = -0.23$<br>$p = .817$ | $B = -0.072$<br>[-0.149, 0.005]<br>$t(10692) = -2.77$<br>$p = .006$                    | $B = 0.004$<br>[-0.073, 0.081]<br>$t(10710) = 0.16$<br>$p = .871$                  | <b><math>B = 0.208</math></b><br>[0.130, 0.286]<br>$t(10702) = 7.94$<br>$p < .001$ | $B = 0.065$<br>[-0.012, 0.143]<br>$t(10552) = 2.51$<br>$p = .012$                      | $B = 0.043$<br>[-0.034, 0.121]<br>$t(10506) = 1.66$<br>$p = .097$                      |
| Heavy drinking episode | <b><math>B = 0.384</math></b><br>[0.276, 0.492]<br>$t(11322) = 10.56$<br>$p < .001$ | $B = 0.048$<br>[-0.051, 0.148]<br>$t(11533) = 1.44$<br>$p = .150$   | <b><math>B = -0.197</math></b><br>[-0.301, -0.093]<br>$t(11484) = -5.63$<br>$p < .001$ | $B = 0.012$<br>[-0.092, 0.117]<br>$t(11481) = 0.35$<br>$p = .723$                  | $B = 0.047$<br>[-0.058, 0.152]<br>$t(11437) = 1.32$<br>$p = .185$                  | $B = -0.068$<br>[-0.173, 0.037]<br>$t(11574) = -1.92$<br>$p = .054$                    | $B = 0.005$<br>[-0.100, 0.110]<br>$t(11420) = 0.14$<br>$p = .885$                      |

*Note.* Depicted are the between-person effects of the overall use index and the two alcohol indices on personality. 99.7% confidence intervals (corresponding to the adjusted significance threshold) are shown in parentheses. Effects printed in bold are significant. E = extraversion, A = agreeableness, C = conscientiousness, N = neuroticism, O = openness, LS = life satisfaction, SE = self-esteem.

Table S55

*Results of the multilevel models with the overall use index and the two alcohol indices predicting personality: Within-person effects.*

|                        | E                                                                                  | A                                                                                   | C                                                                                   | N                                                                                 | O                                                                                 | LS                                                                                  | SE                                                                                  |
|------------------------|------------------------------------------------------------------------------------|-------------------------------------------------------------------------------------|-------------------------------------------------------------------------------------|-----------------------------------------------------------------------------------|-----------------------------------------------------------------------------------|-------------------------------------------------------------------------------------|-------------------------------------------------------------------------------------|
| Overall use            | <i>B</i> = -0.068<br>[-0.299, 0.161]<br><i>t</i> (99) = -0.89<br><i>p</i> = .373   | <i>B</i> = -0.145<br>[-0.412, 0.113]<br><i>t</i> (102) = -1.68<br><i>p</i> = .096   | <i>B</i> = -0.078<br>[-0.303, 0.150]<br><i>t</i> (88) = -1.06<br><i>p</i> = .293    | <i>B</i> = 0.213<br>[-0.023, 0.442]<br><i>t</i> (97) = 2.83<br><i>p</i> = .006    | <i>B</i> = 0.042<br>[-0.124, 0.209]<br><i>t</i> (24133) = 0.75<br><i>p</i> = .451 | <i>B</i> = -0.048<br>[-0.341, 0.254]<br><i>t</i> (90) = -0.50<br><i>p</i> = .621    | <i>B</i> = -0.186<br>[-0.437, 0.068]<br><i>t</i> (101) = -2.23<br><i>p</i> = .028   |
| Alcohol frequency      | <i>B</i> = -0.006<br>[-0.050, 0.038]<br><i>t</i> (1205) = -0.43<br><i>p</i> = .664 | <i>B</i> = -0.025<br>[-0.074, 0.025]<br><i>t</i> (23225) = -1.49<br><i>p</i> = .135 | <i>B</i> = -0.026<br>[-0.073, 0.020]<br><i>t</i> (23049) = -1.68<br><i>p</i> = .093 | <i>B</i> = 0.001<br>[-0.045, 0.047]<br><i>t</i> (23027) = 0.07<br><i>p</i> = .944 | <i>B</i> = 0.016<br>[-0.029, 0.062]<br><i>t</i> (22968) = 1.07<br><i>p</i> = .283 | <i>B</i> = -0.015<br>[-0.068, 0.039]<br><i>t</i> (23312) = -0.82<br><i>p</i> = .412 | <i>B</i> = -0.007<br>[-0.057, 0.044]<br><i>t</i> (23080) = -0.38<br><i>p</i> = .703 |
| Heavy drinking episode | <i>B</i> = 0.031<br>[-0.005, 0.067]<br><i>t</i> (23068) = 2.52<br><i>p</i> = .012  | <i>B</i> = 0.007<br>[-0.037, 0.050]<br><i>t</i> (23720) = 0.46<br><i>p</i> = .648   | <i>B</i> = -0.011<br>[-0.052, 0.030]<br><i>t</i> (23469) = -0.80<br><i>p</i> = .422 | <i>B</i> = 0.016<br>[-0.024, 0.057]<br><i>t</i> (23436) = 1.19<br><i>p</i> = .235 | <i>B</i> = 0.032<br>[-0.008, 0.072]<br><i>t</i> (23355) = 2.40<br><i>p</i> = .016 | <i>B</i> = 0.007<br>[-0.040, 0.054]<br><i>t</i> (23827) = 0.42<br><i>p</i> = .677   | <i>B</i> = -0.007<br>[-0.053, 0.039]<br><i>t</i> (1492) = -0.46<br><i>p</i> = .649  |

*Note.* Depicted are the within-person effects of the overall use index and the two alcohol indices on personality. 99.7% confidence intervals (corresponding to the adjusted significance threshold) are shown in parentheses. Effects printed in bold are significant. E = extraversion, A = agreeableness, C = conscientiousness, N = neuroticism, O = openness, LS = life satisfaction, SE = self-esteem.



Table S56

*Results of the interactions between age group and the within-person effects of substance use*

|               | E                                                                    | A                                                                    | C                                                                    | N                                                                   | O                                                                    | LS                                                                   | SE                                                                   |
|---------------|----------------------------------------------------------------------|----------------------------------------------------------------------|----------------------------------------------------------------------|---------------------------------------------------------------------|----------------------------------------------------------------------|----------------------------------------------------------------------|----------------------------------------------------------------------|
| Smoking       | $B = 0.014$<br>[-0.155, 0.183]<br>$t(1503) = 0.25$<br>$p = 1.000$    | $B = -0.066$<br>[-0.273, 0.141]<br>$t(1589) = -0.95$<br>$p = 1.000$  | $B = -0.052$<br>[-0.246, 0.143]<br>$t(1533) = -0.79$<br>$p = 1.000$  | $B = 0.090$<br>[-0.094, 0.274]<br>$t(1506) = 1.46$<br>$p = 1.000$   | $B = 0.046$<br>[-0.131, 0.222]<br>$t(1576) = 0.77$<br>$p = 1.000$    | $B = -0.105$<br>[-0.325, 0.115]<br>$t(1575) = -1.42$<br>$p = 1.000$  | $B = -0.112$<br>[-0.314, 0.089]<br>$t(1538) = -1.66$<br>$p = 1.000$  |
| Alcohol heavy | $B = 0.105$<br>[-0.192, 0.402]<br>$t(23700) = 1.05$<br>$p = 1.000$   | $B = 0.136$<br>[-0.217, 0.489]<br>$t(24756) = 1.14$<br>$p = 1.000$   | $B = -0.227$<br>[-0.562, 0.107]<br>$t(24335) = -2.02$<br>$p = 1.000$ | $B = -0.267$<br>[-0.598, 0.063]<br>$t(24277) = -2.40$<br>$p = .719$ | $B = 0.093$<br>[-0.234, 0.419]<br>$t(24164) = 0.84$<br>$p = 1.000$   | $B = 0.071$<br>[-0.310, 0.453]<br>$t(24916) = 0.56$<br>$p = 1.000$   | $B = 0.031$<br>[-0.331, 0.392]<br>$t(24549) = 0.25$<br>$p = 1.000$   |
| Sedatives     | $B = 0.021$<br>[-0.338, 0.379]<br>$t(683) = 0.17$<br>$p = 1.000$     | $B = 0.150$<br>[-0.246, 0.547]<br>$t(807) = 1.13$<br>$p = 1.000$     | $B = 0.319$<br>[-0.054, 0.692]<br>$t(751) = 2.54$<br>$p = .711$      | $B = 0.013$<br>[-0.379, 0.406]<br>$t(748) = 0.10$<br>$p = 1.000$    | $B = 0.027$<br>[-0.347, 0.402]<br>$t(762) = 0.21$<br>$p = 1.000$     | $B = 0.419$<br>[-0.081, 0.919]<br>$t(738) = 2.49$<br>$p = .711$      | $B = 0.049$<br>[-0.357, 0.456]<br>$t(816) = 0.36$<br>$p = 1.000$     |
| Soft drugs    | $B = 0.006$<br>[-0.225, 0.239]<br>$t(390) = 0.08$<br>$p = 1.000$     | $B = -0.078$<br>[-0.346, 0.190]<br>$t(424) = -0.86$<br>$p = 1.000$   | $B = -0.114$<br>[-0.357, 0.129]<br>$t(344) = -1.40$<br>$p = 1.000$   | $B = 0.019$<br>[-0.216, 0.254]<br>$t(384) = 0.24$<br>$p = 1.000$    | $B = 0.016$<br>[-0.226, 0.258]<br>$t(405) = 0.19$<br>$p = 1.000$     | $B = -0.099$<br>[-0.423, 0.226]<br>$t(441) = -0.91$<br>$p = 1.000$   | $B = -0.045$<br>[-0.320, 0.230]<br>$t(399) = -0.49$<br>$p = 1.000$   |
| Ecstasy       | $B = -0.037$<br>[-0.508, 0.439]<br>$t(124) = -0.23$<br>$p = 1.000$   | $B = -0.253$<br>[-0.766, 0.274]<br>$t(120) = -1.46$<br>$p = 1.000$   | $B = -0.042$<br>[-0.546, 0.474]<br>$t(103) = -0.25$<br>$p = 1.000$   | $B = 0.064$<br>[-0.446, 0.578]<br>$t(125) = 0.38$<br>$p = 1.000$    | $B = 0.117$<br>[-0.373, 0.622]<br>$t(133) = 0.71$<br>$p = 1.000$     | $B = -0.190$<br>[-0.635, 0.255]<br>$t(24884) = -1.27$<br>$p = 1.000$ | $B = -0.007$<br>[-0.517, 0.516]<br>$t(113) = -0.04$<br>$p = 1.000$   |
| Hallucinogens | $B = -0.326$<br>[-0.943, 0.290]<br>$t(24624) = -1.57$<br>$p = 1.000$ | $B = -0.798$<br>[-1.526, -0.070]<br>$t(25991) = -3.25$<br>$p = .252$ | $B = 0.094$<br>[-0.772, 1.050]<br>$t(34) = 0.33$<br>$p = 1.000$      | $B = 0.625$<br>[-0.059, 1.309]<br>$t(25386) = 2.71$<br>$p = .711$   | $B = -0.214$<br>[-0.890, 0.463]<br>$t(25243) = -0.94$<br>$p = 1.000$ | $B = -0.010$<br>[-0.797, 0.778]<br>$t(26172) = -0.04$<br>$p = 1.000$ | $B = -0.197$<br>[-0.944, 0.550]<br>$t(25766) = -0.78$<br>$p = 1.000$ |

|            |                   |                   |                    |                   |                   |                   |                   |
|------------|-------------------|-------------------|--------------------|-------------------|-------------------|-------------------|-------------------|
|            | $B = -0.117$      | $B = -0.025$      | $B = -0.346$       | $B = 0.138$       | $B = -0.226$      | $B = 0.175$       | $B = -0.048$      |
| Hard drugs | $[-0.722, 0.505]$ | $[-0.698, 0.673]$ | $[-0.811, 0.119]$  | $[-0.460, 0.760]$ | $[-0.772, 0.333]$ | $[-0.355, 0.705]$ | $[-0.747, 0.647]$ |
|            | $t(98) = -0.58$   | $t(91) = -0.11$   | $t(24477) = -2.21$ | $t(85) = 0.68$    | $t(107) = -1.23$  | $t(25122) = 0.98$ | $t(87) = -0.21$   |
|            | $p = 1.000$       | $p = 1.000$       | $p = .998$         | $p = 1.000$       | $p = 1.000$       | $p = 1.000$       | $p = 1.000$       |

*Note.* Depicted are the interactions between the within-person effects and age-group (“1” if participants are 24 years old or younger and “0” otherwise). The reported  $p$ -values were corrected to control the false discovery rate. 99.7% confidence intervals (corresponding to the adjusted significance threshold) are shown in parentheses. E = extraversion, A = agreeableness, C = conscientiousness, N = neuroticism, O = openness, LS = life satisfaction, SE = self-esteem.

Table S57

*Within-person effects for emerging adults only*

|               | E                                          | A                                          | C                                          | N                                          | O                                          | LS                                         | SE                                         |
|---------------|--------------------------------------------|--------------------------------------------|--------------------------------------------|--------------------------------------------|--------------------------------------------|--------------------------------------------|--------------------------------------------|
| Smoking       | $B = 0.09$<br>[-0.08, 0.27]<br>$p = .113$  | $B = 0.01$<br>[-0.19, 0.21]<br>$p = .905$  | $B = -0.08$<br>[-0.27, 0.11]<br>$p = .207$ | $B = 0.00$<br>[-0.19, 0.19]<br>$p = .956$  | $B = 0.06$<br>[-0.13, 0.25]<br>$p = .349$  | $B = -0.07$<br>[-0.29, 0.15]<br>$p = .349$ | $B = -0.03$<br>[-0.22, 0.17]<br>$p = .674$ |
| Alcohol heavy | $B = 0.16$<br>[-0.21, 0.52]<br>$p = .104$  | $B = 0.14$<br>[-0.27, 0.56]<br>$p = .851$  | $B = -0.34$<br>[-0.73, 0.05]<br>$p = .004$ | $B = -0.21$<br>[-0.60, 0.19]<br>$p = .941$ | $B = 0.10$<br>[-0.30, 0.50]<br>$p = .446$  | $B = 0.02$<br>[-0.43, 0.48]<br>$p = .563$  | $B = -0.02$<br>[-0.43, 0.38]<br>$p = .871$ |
| Sedatives     | $B = -0.12$<br>[-0.52, 0.29]<br>$p = .393$ | $B = 0.18$<br>[-0.27, 0.63]<br>$p = .247$  | $B = 0.35$<br>[-0.08, 0.78]<br>$p = .015$  | $B = 0.08$<br>[-0.36, 0.51]<br>$p = .598$  | $B = 0.09$<br>[-0.35, 0.53]<br>$p = .530$  | $B = 0.45$<br>[-0.04, 0.95]<br>$p = .007$  | $B = 0.00$<br>[-0.45, 0.44]<br>$p = .988$  |
| Soft drugs    | $B = 0.00$<br>[-0.19, 0.19]<br>$p = .493$  | $B = -0.01$<br>[-0.23, 0.20]<br>$p = .841$ | $B = -0.16$<br>[-0.36, 0.04]<br>$p = .019$ | $B = 0.03$<br>[-0.17, 0.24]<br>$p = .636$  | $B = -0.01$<br>[-0.22, 0.20]<br>$p = .565$ | $B = -0.10$<br>[-0.34, 0.14]<br>$p = .105$ | $B = -0.08$<br>[-0.30, 0.13]<br>$p = .237$ |
| Ecstasy       | $B = -0.15$<br>[-0.47, 0.18]<br>$p = .175$ | $B = -0.22$<br>[-0.59, 0.14]<br>$p = .071$ | $B = -0.14$<br>[-0.48, 0.20]<br>$p = .228$ | $B = 0.11$<br>[-0.24, 0.45]<br>$p = .369$  | $B = 0.03$<br>[-0.33, 0.38]<br>$p = .828$  | $B = -0.05$<br>[-0.45, 0.36]<br>$p = .732$ | $B = -0.14$<br>[-0.50, 0.22]<br>$p = .240$ |
| Hallucinogens | $B = -0.17$<br>[-0.62, 0.29]<br>$p = .274$ | $B = -0.50$<br>[-1.01, 0.00]<br>$p = .003$ | $B = -0.37$<br>[-0.85, 0.11]<br>$p = .022$ | $B = 0.20$<br>[-0.29, 0.69]<br>$p = .221$  | $B = -0.08$<br>[-0.57, 0.41]<br>$p = .686$ | $B = 0.16$<br>[-0.40, 0.72]<br>$p = .389$  | $B = -0.11$<br>[-0.61, 0.39]<br>$p = .508$ |
| Hard drugs    | $B = -0.16$<br>[-0.57, 0.24]<br>$p = .237$ | $B = -0.33$<br>[-0.79, 0.12]<br>$p = .029$ | $B = -0.30$<br>[-0.73, 0.13]<br>$p = .036$ | $B = 0.12$<br>[-0.32, 0.55]<br>$p = .433$  | $B = -0.29$<br>[-0.73, 0.15]<br>$p = .051$ | $B = 0.15$<br>[-0.36, 0.65]<br>$p = .383$  | $B = -0.18$<br>[-0.63, 0.26]<br>$p = .221$ |

*Note.* Depicted are the within person effects for participants that are 24 years old or younger. The reported  $p$ -values are unadjusted and the significance threshold corresponds to the threshold from the main analyses ( $\alpha = .003$ ). None of the tests surpassed this threshold. 99.7% confidence intervals (corresponding to the adjusted significance threshold) are shown in parentheses. E = extraversion, A = agreeableness, C = conscientiousness, N = neuroticism, O = openness, LS = life satisfaction, SE = self-esteem.

Table S58  
*Measurement invariance analyses*

| Personality variable | No constraints           | Equal loadings                                                           | Equal loadings and intercepts                                             |
|----------------------|--------------------------|--------------------------------------------------------------------------|---------------------------------------------------------------------------|
| E                    | CFI=0.945<br>RMSEA=0.024 | CFI=0.945<br>RMSEA=0.024<br>$\Delta$ CFI=-4e-04<br>$\Delta$ RMSEA=-3e-04 | CFI=0.943<br>RMSEA=0.024<br>$\Delta$ CFI=-0.0020<br>$\Delta$ RMSEA=-2e-04 |
| A                    | CFI=0.956<br>RMSEA=0.019 | CFI=0.956<br>RMSEA=0.018<br>$\Delta$ CFI=0.0000<br>$\Delta$ RMSEA=-3e-04 | CFI=0.954<br>RMSEA=0.018<br>$\Delta$ CFI=-0.0014<br>$\Delta$ RMSEA=-2e-04 |
| C                    | CFI=0.936<br>RMSEA=0.022 | CFI=0.935<br>RMSEA=0.022<br>$\Delta$ CFI=-3e-04<br>$\Delta$ RMSEA=-3e-04 | CFI=0.933<br>RMSEA=0.022<br>$\Delta$ CFI=-0.0023<br>$\Delta$ RMSEA=-2e-04 |
| N                    | CFI=0.917<br>RMSEA=0.030 | CFI=0.916<br>RMSEA=0.030<br>$\Delta$ CFI=-4e-04<br>$\Delta$ RMSEA=-4e-04 | CFI=0.915<br>RMSEA=0.030<br>$\Delta$ CFI=-0.0021<br>$\Delta$ RMSEA=-5e-04 |
| O                    | CFI=0.904<br>RMSEA=0.028 | CFI=0.904<br>RMSEA=0.028<br>$\Delta$ CFI=0.0000<br>$\Delta$ RMSEA=-4e-04 | CFI=0.903<br>RMSEA=0.027<br>$\Delta$ CFI=-0.0016<br>$\Delta$ RMSEA=-6e-04 |
| SE                   | CFI=0.867<br>RMSEA=0.040 | CFI=0.867<br>RMSEA=0.040<br>$\Delta$ CFI=-4e-04<br>$\Delta$ RMSEA=-5e-04 | CFI=0.865<br>RMSEA=0.039<br>$\Delta$ CFI=-0.0020<br>$\Delta$ RMSEA=-8e-04 |
| LS                   | CFI=0.981<br>RMSEA=0.026 | CFI=0.980<br>RMSEA=0.026<br>$\Delta$ CFI=-3e-04<br>$\Delta$ RMSEA=-6e-04 | CFI=0.980<br>RMSEA=0.025<br>$\Delta$ CFI=-9e-04<br>$\Delta$ RMSEA=-9e-04  |

*Note.*  $\Delta$ CFI and  $\Delta$ RMSEA indicate the changes in CFI and RMSEA compared to the model without constraints. Large decreases in CFI and increases in RMSEA would indicate worse model fit in more restricted models.

**Measurement invariance**

Separate structural equation models were fit for each personality variable with the following specifications: (1) One personality factor for each wave with items from the same wave loading on it, (2) free correlations between wave-specific personality factors, and (3) free residual correlations of the same items across time. In the unconstrained model, the intercept and loading of the first item was fixed across waves and the intercept and variance of the first personality factor was set to 0 and 1, respectively. All other loadings and intercepts were estimated freely. In the second model, all item loadings were constrained across waves. Finally, in the third model, both item loadings and intercepts were constrained across waves. In order to account for missingness, we used full information maximum likelihood (FIML) estimation. The analyses were restricted to waves with sufficient participant overlap (> 15%) with other assessment waves. This led to the inclusion of waves 1,2,4,6,7, and 9 only. Measurement invariance was assessed as the difference in CFI and RMSEA between the restricted and unrestricted models. Following the guidelines from Chen (2007), invariance was not rejected if CFI decreased by less than .010 and RMSEA increased by less than .015 in more restricted models. In line with these suggestions, our results indicate strong measurement invariance (all  $\Delta\text{CFI} > -.003$  &  $\Delta\text{RMSEA} < 0$ ). The code for the measurement invariance analyses can be found on our OSF-page (<https://bit.ly/2HSMWZ9>).

Table S59

*Latent state-trait analyses*

| Trait | Fit                      | Trait Variance                      | State Variance                             |
|-------|--------------------------|-------------------------------------|--------------------------------------------|
| E     | CFI=0.943<br>RMSEA=0.024 | Var= 87.03%<br>$Z = 35.37, p <.001$ | Var= 12.97%<br>$Z_{\min} = 15.30, p <.001$ |
| A     | CFI=0.953<br>RMSEA=0.019 | Var= 80.68%<br>$Z = 36.01, p <.001$ | Var= 19.32%<br>$Z_{\min} = 11.87, p <.001$ |
| C     | CFI=0.935<br>RMSEA=0.022 | Var= 77.02%<br>$Z = 20.19, p <.001$ | Var= 22.98%<br>$Z_{\min} = 11.62, p <.001$ |
| N     | CFI=0.919<br>RMSEA=0.029 | Var= 78.86%<br>$Z = 48.88, p <.001$ | Var= 21.14%<br>$Z_{\min} = 17.55, p <.001$ |
| O     | CFI=0.909<br>RMSEA=0.027 | Var= 85.03%<br>$Z = 30.17, p <.001$ | Var= 14.97%<br>$Z_{\min} = 10.48, p <.001$ |
| SE    | CFI=0.877<br>RMSEA=0.038 | Var= 67.35%<br>$Z = 32.37, p <.001$ | Var= 32.65%<br>$Z_{\min} = 28.27, p <.001$ |
| LS    | CFI=0.980<br>RMSEA=0.026 | Var= 71.12%<br>$Z = 52.62, p <.001$ | Var= 28.88%<br>$Z_{\min} = 29.69, p <.001$ |

*Note.* Var indicates the relative proportion of reliable state and trait variance, averaged across items.  $Z_{\min}$  indicates the smallest Z-value for all occasion-specific variance estimates for the respective trait.

**Latent state-trait models**

In order to ensure that our personality variables showed reliable variance across waves (in addition to a stable trait factor and measurement error), we computed separate latent state-trait models (LST; Steyer, Ferring, & Schmitt, 1992) for each trait. The models were specified as follows: (1) An occasion-specific personality factor for each wave on which all items for the respective wave load, (2) an overall trait factor on which all items load (bifactor LST), and (3) correlated residuals for the same items across time. The loadings of items were constrained to be equal across waves for both the occasion-specific factors and the trait factor. All occasion-specific variances were estimated freely. In order to determine the relative amount of reliable state and trait variance, the state and trait variance was computed for each item and divided by the sum of its state and trait variance, respectively. These variance estimates were averaged across all items for each trait. Our results indicated that all occasion-specific factors evidenced substantial reliable variance ( $M = 21.84\%$ ; range: 12.97% for extraversion to 32.65% for self-esteem, all  $p$ 's  $<.001$ ). The code for the latent state-trait models can be found on our OSF-page (<https://bit.ly/2HSMWZ9>).
